# Supplementary material
Source: PubMed Central journal article supplement (PMC6209453)
Supplement: NIHMS990020-supplement-Supplemental_Figures.pdf [file NIHMS990020-supplement-Supplemental_Figures.pdf]

## **SUPPLEMENTARY FIGURES**

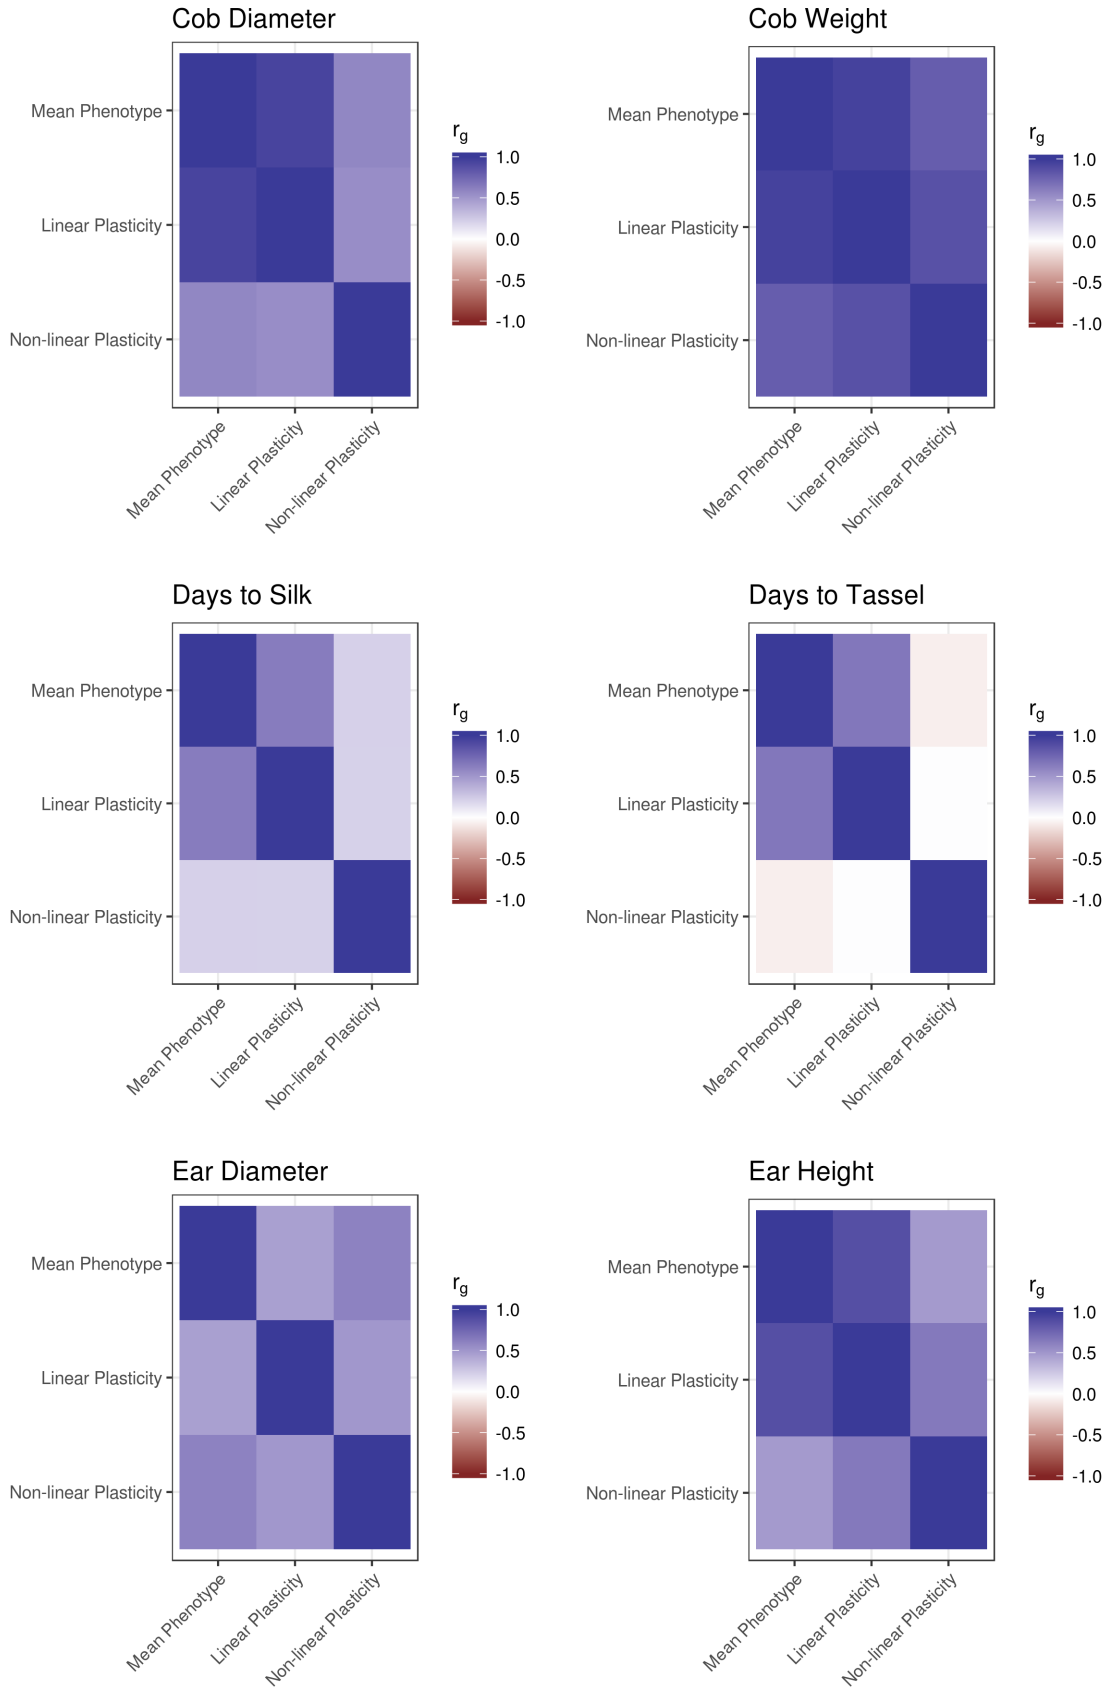

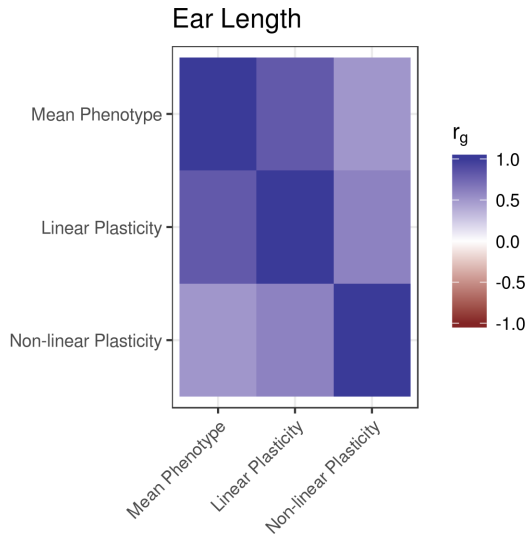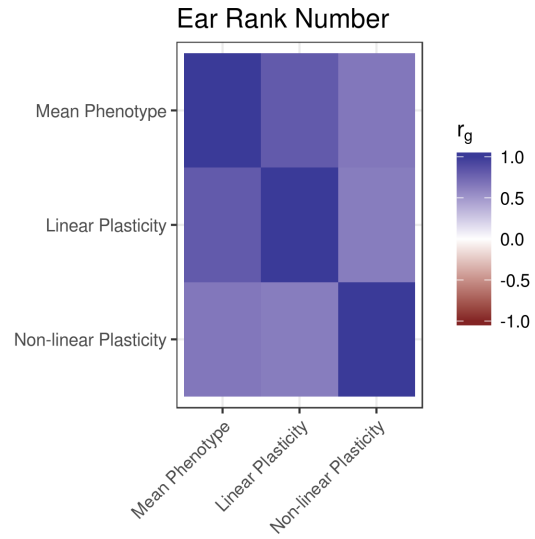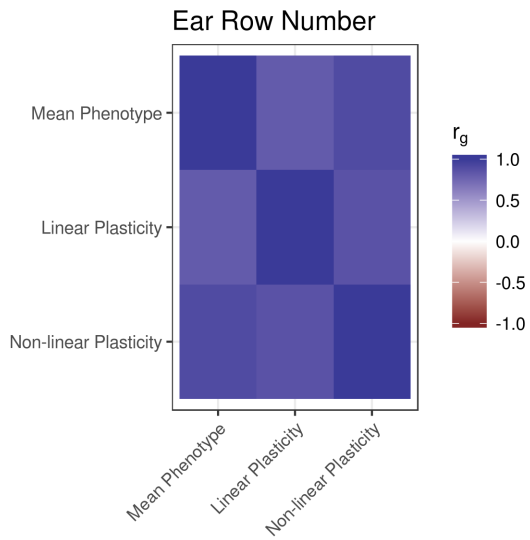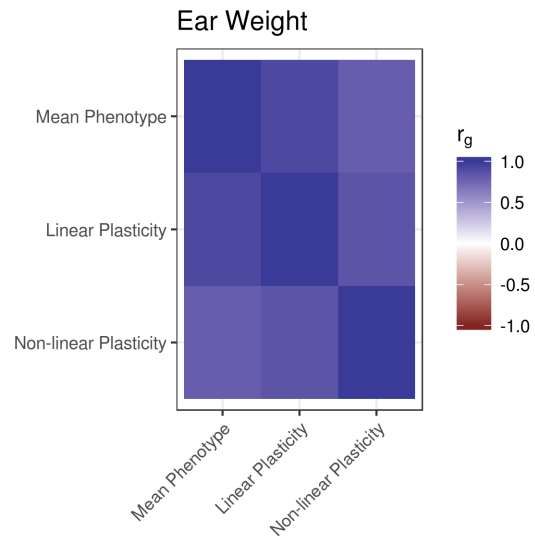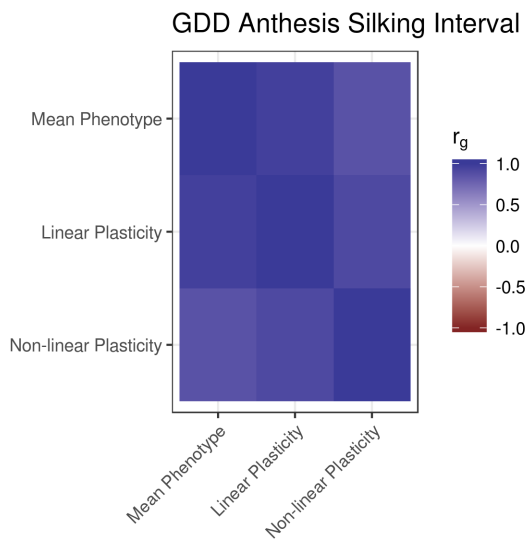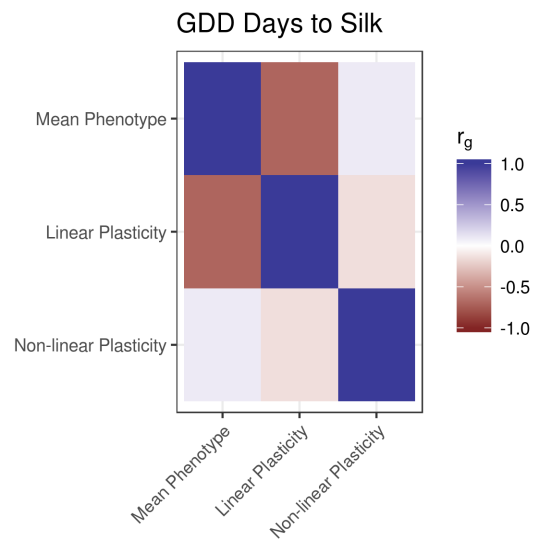

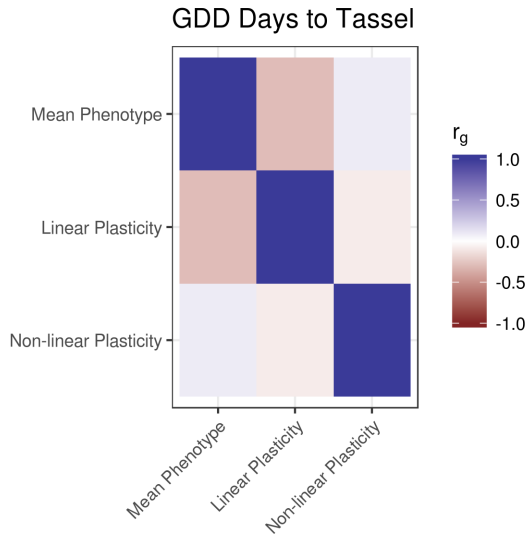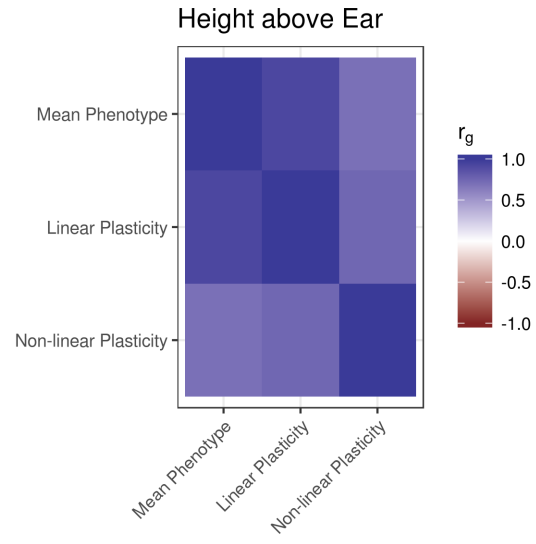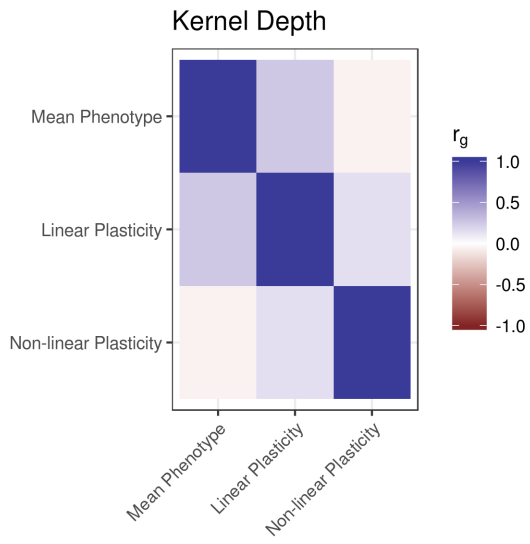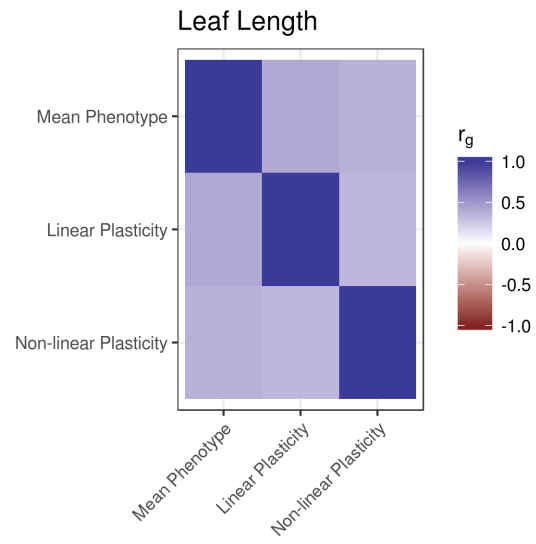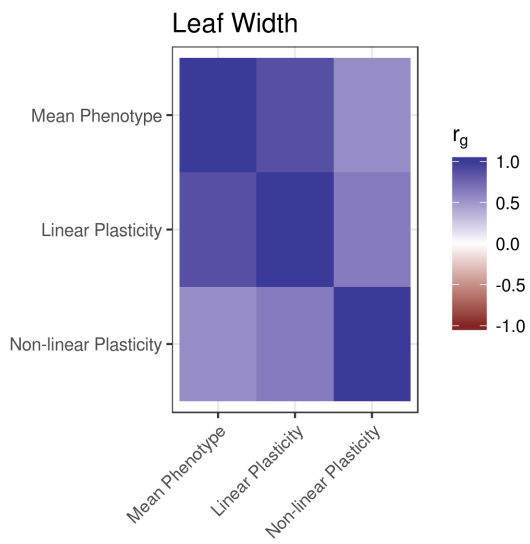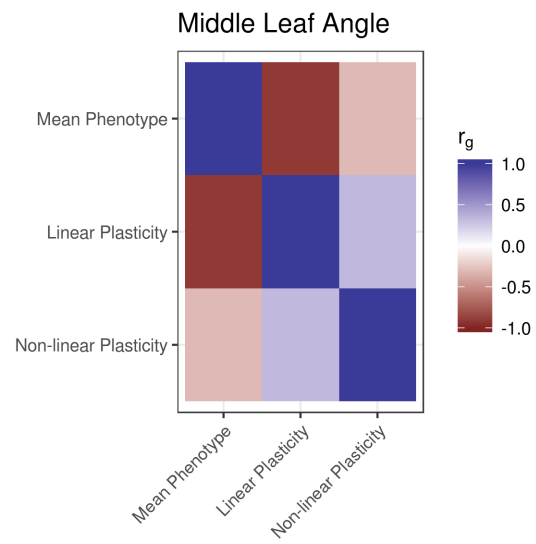



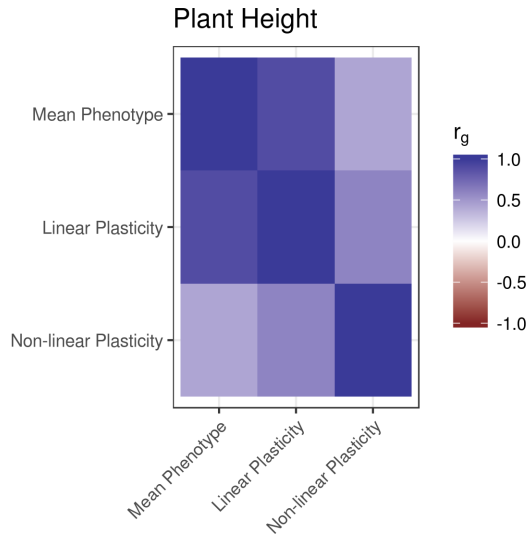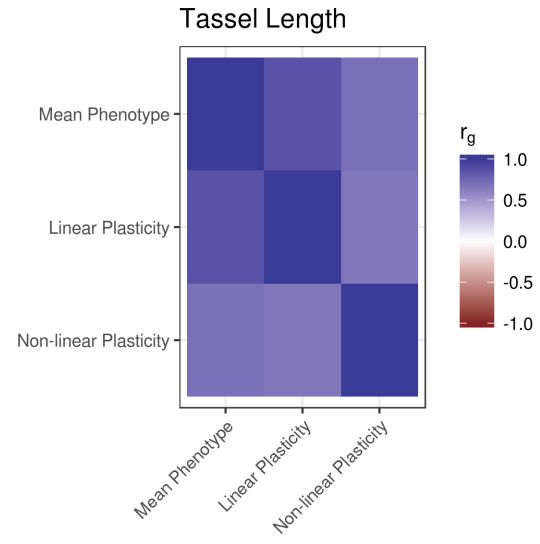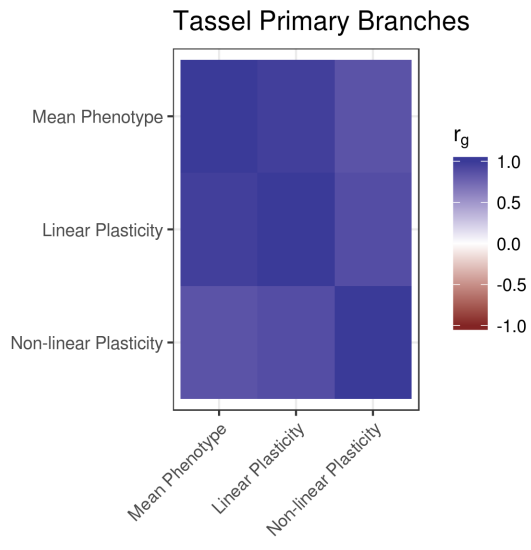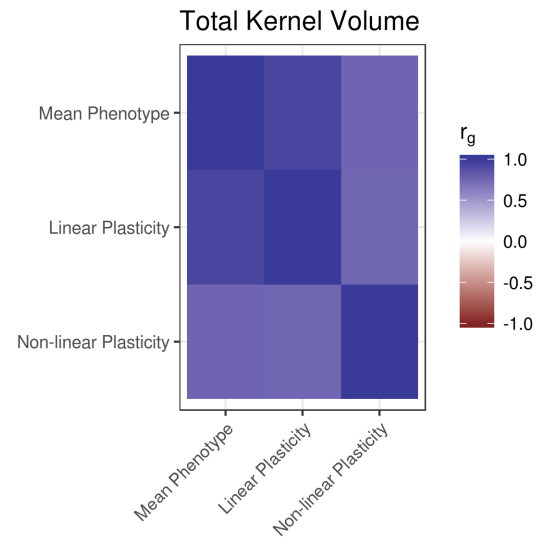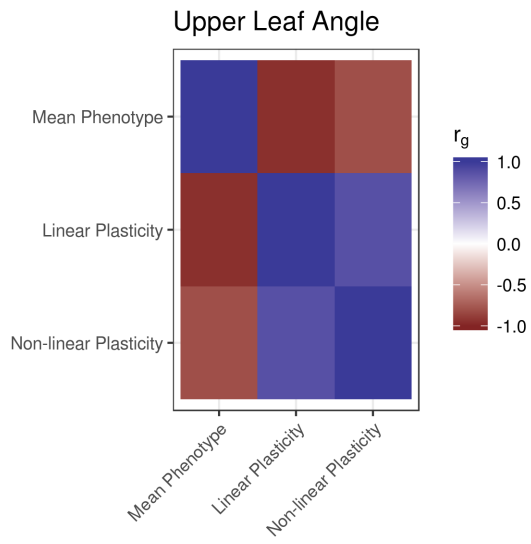

**Supplementary Figure 1.** Genetic correlations between mean phenotype values, linear plasticity, and non-linear plasticity for each phenotype.

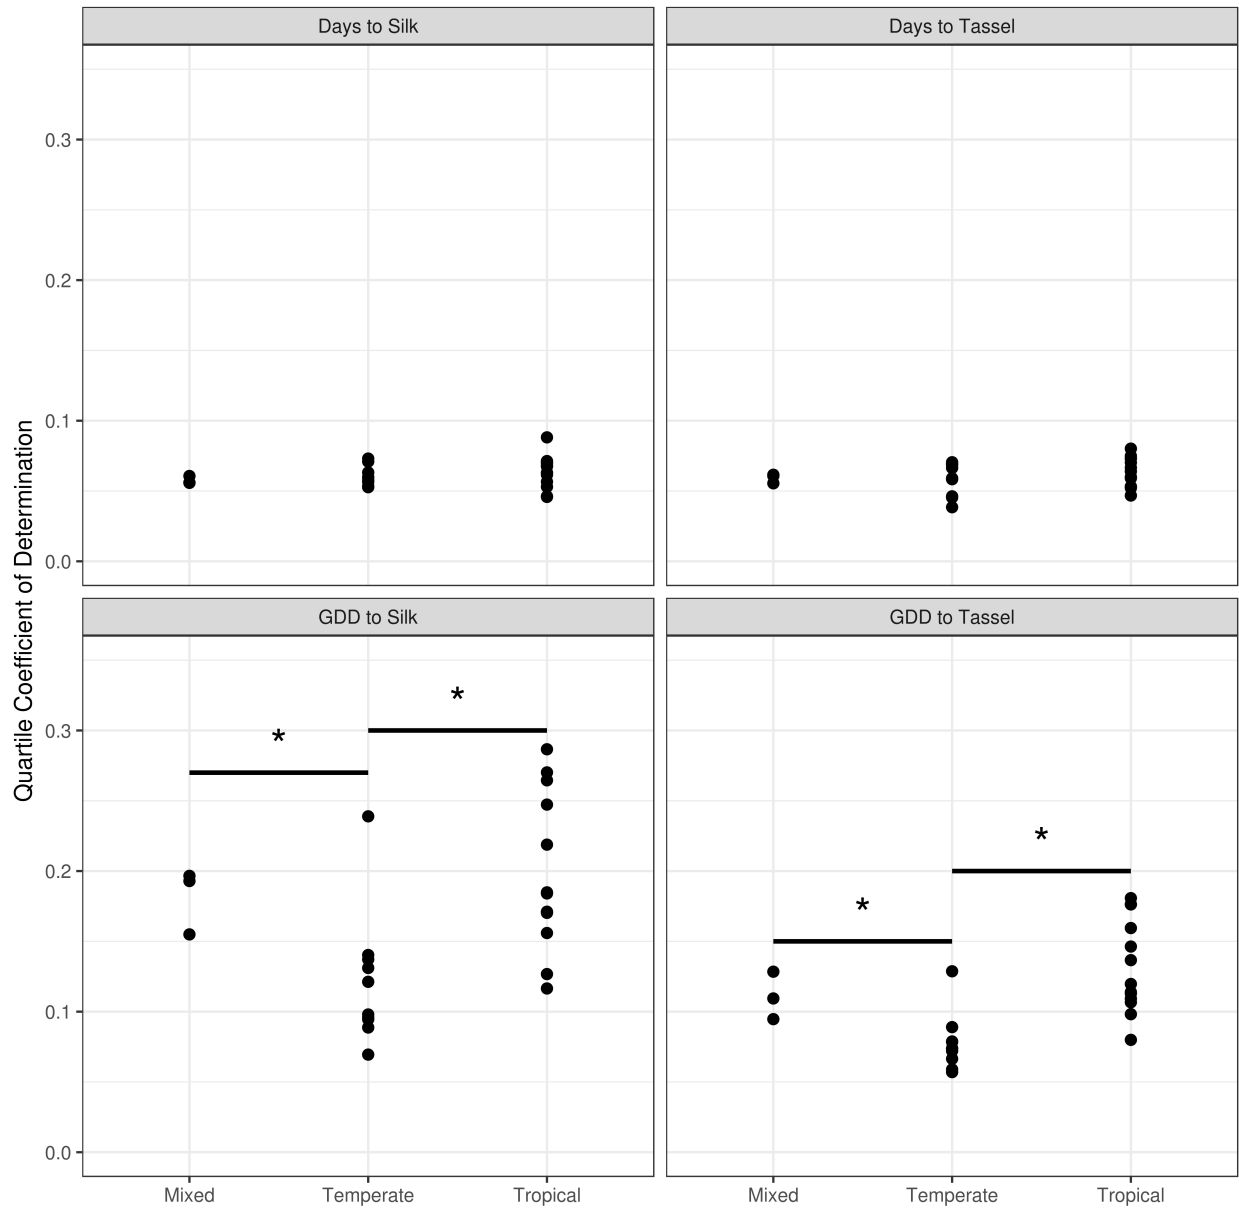

**Supplementary Figure 2.** Family-wise quartile coefficients of dispersion for flowering time phenotypes. Germplasm group assignments are taken from Yan *et al.*<sup>1</sup>.  $n = 3$  for mixed, 10 for temperate, and 13 for tropical. Asterisks indicate that two groups have different distributions of dispersion coefficients at the  $\alpha = 0.05$  level (two-sided Mann-Whitney U test).

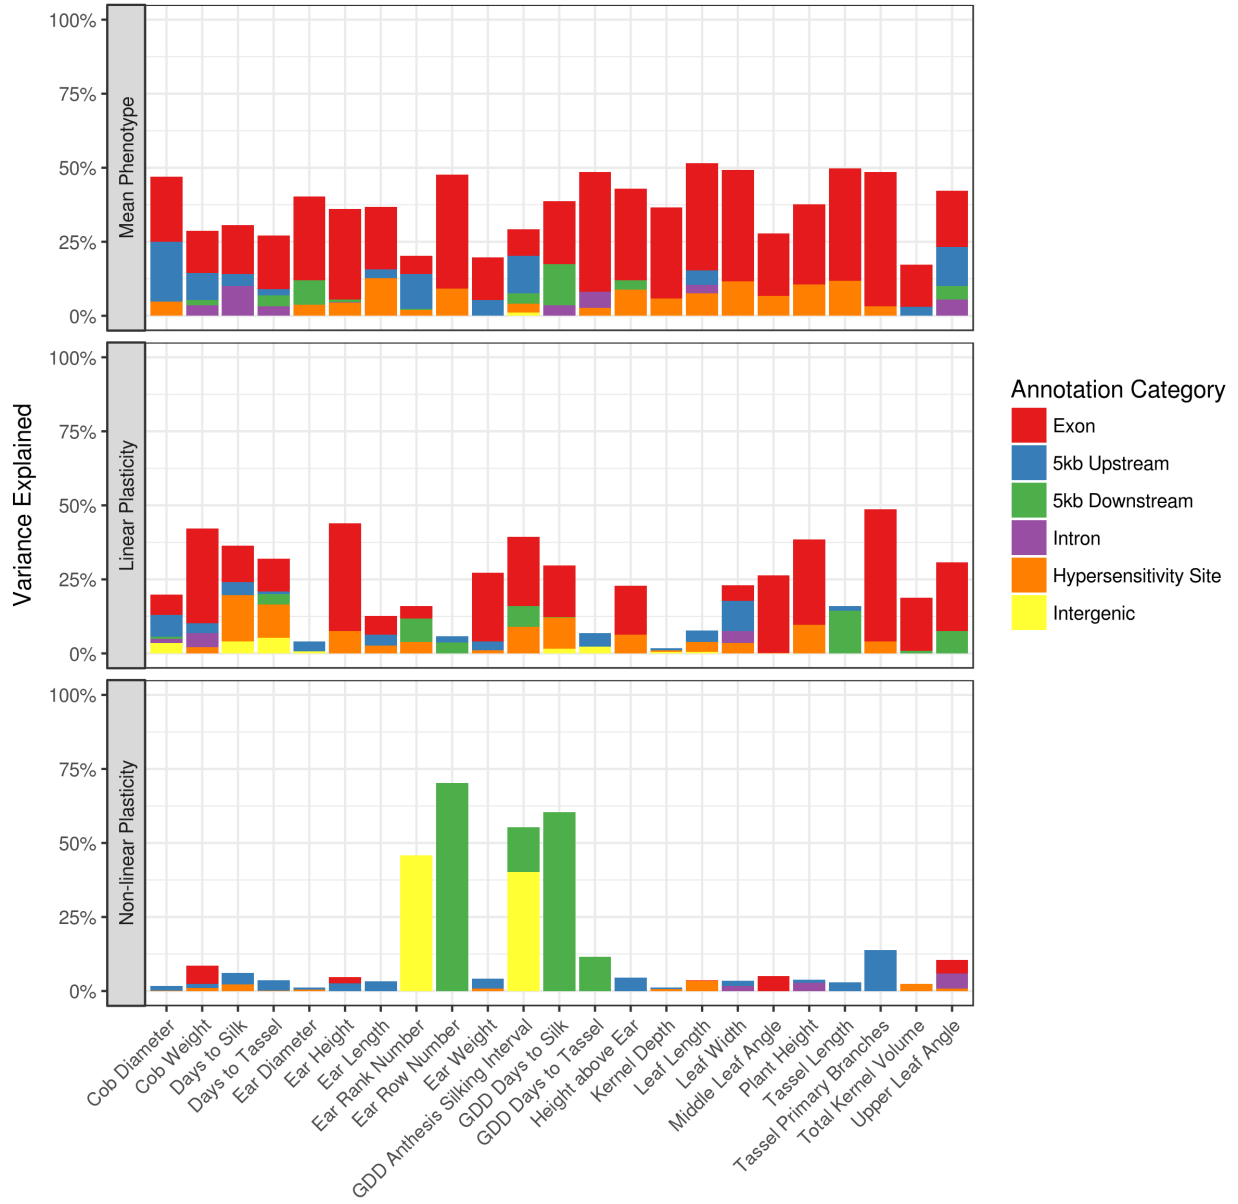

**Supplementary Figure 3.** Percent variance explained by genome-wide SNPs hierarchically assigned to annotation categories

## a. Cob Diameter

### Mean Phenotype

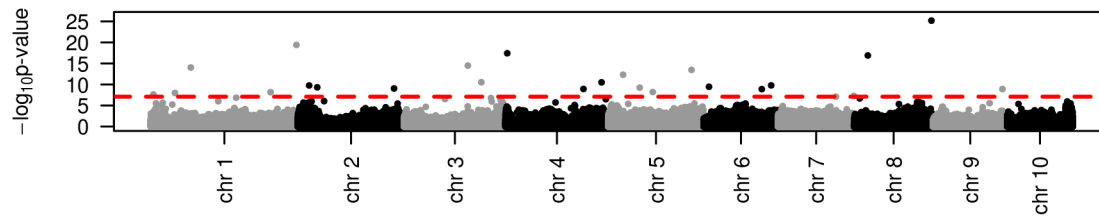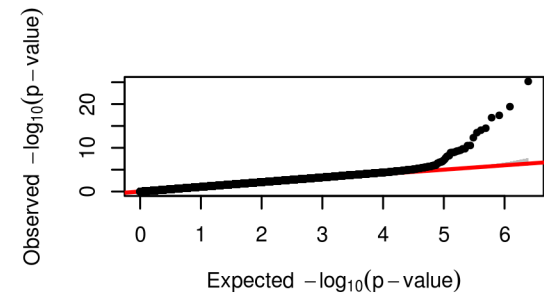

### Linear Plasticity

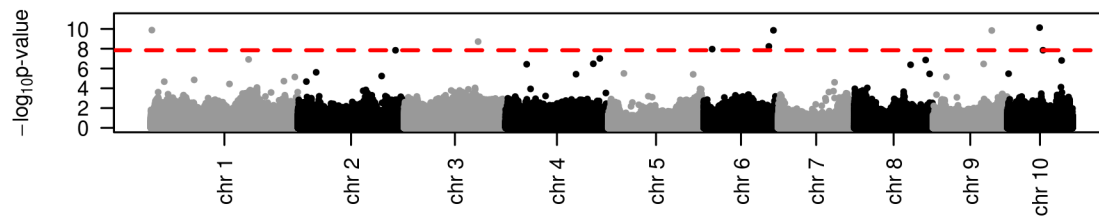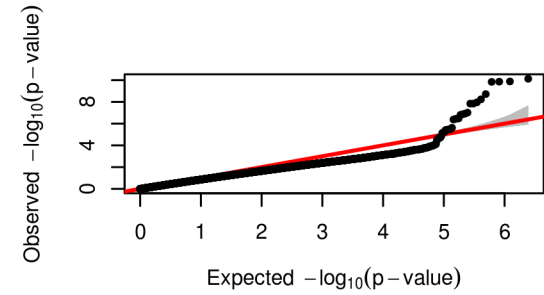

### Non-linear Plasticity

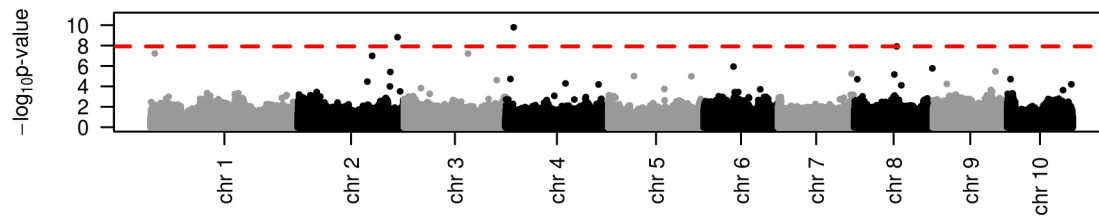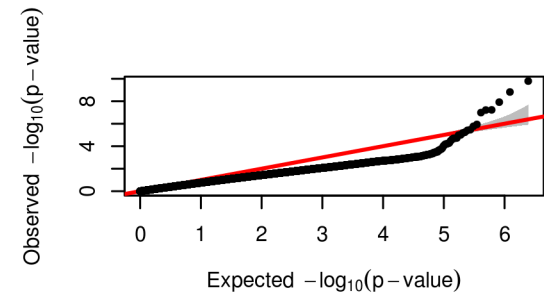

## b. Cob Weight

### Mean Phenotype

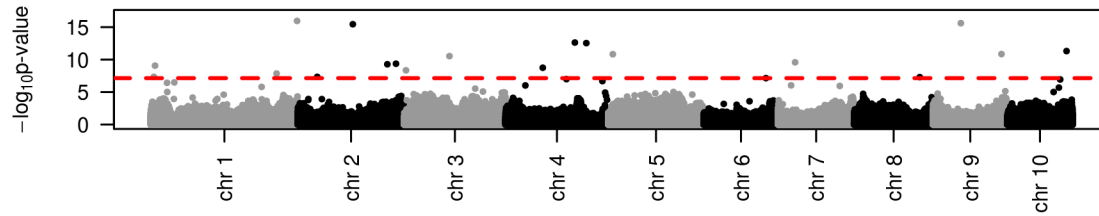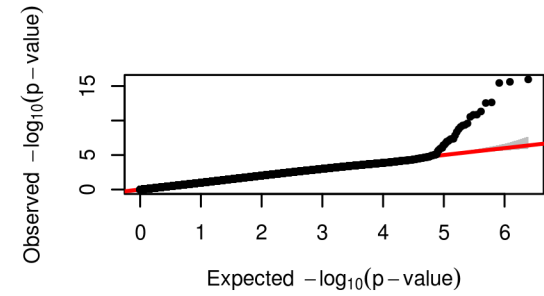

### Linear Plasticity

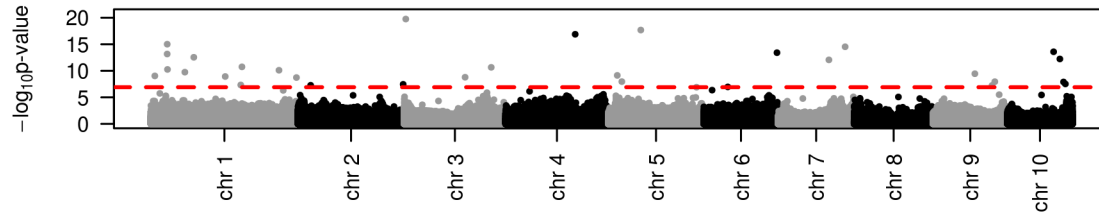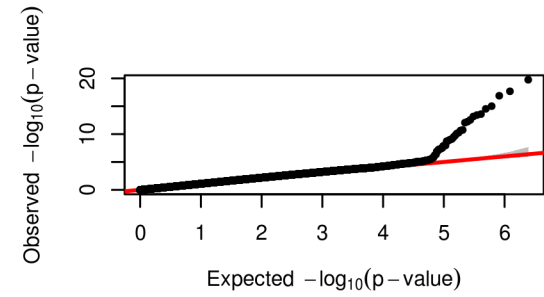

### Non-linear Plasticity

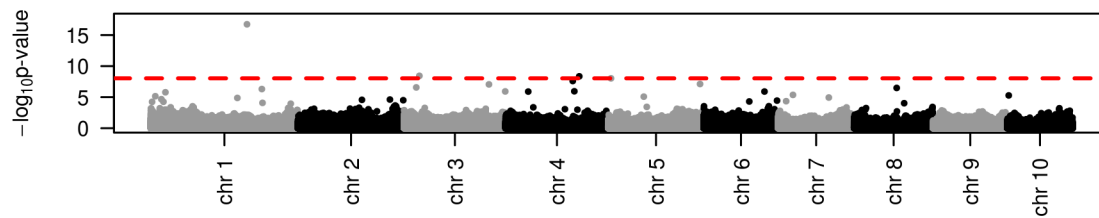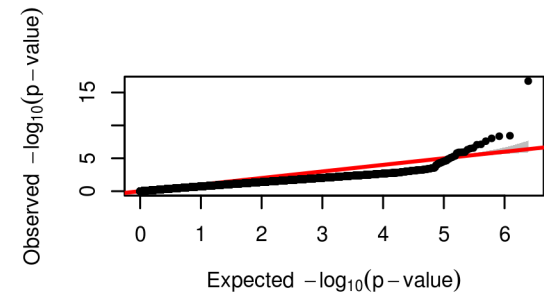

### c. Days to Silk

#### Mean Phenotype

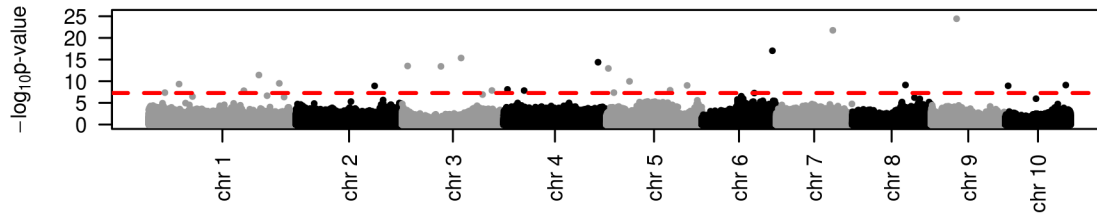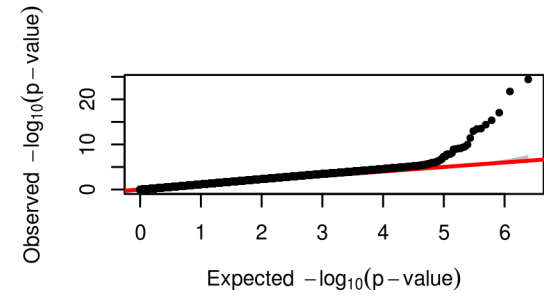

#### Linear Plasticity

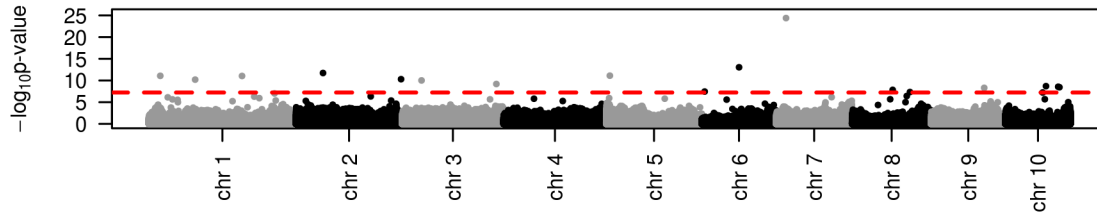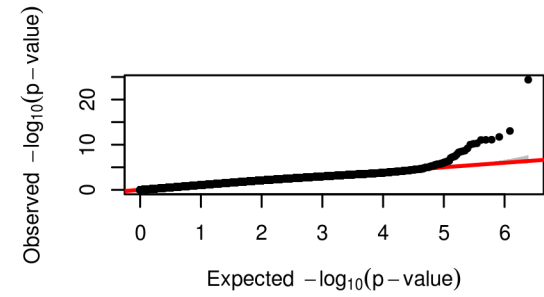

#### Non-linear Plasticity

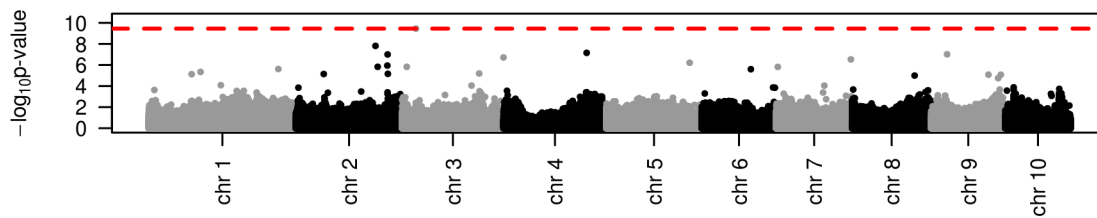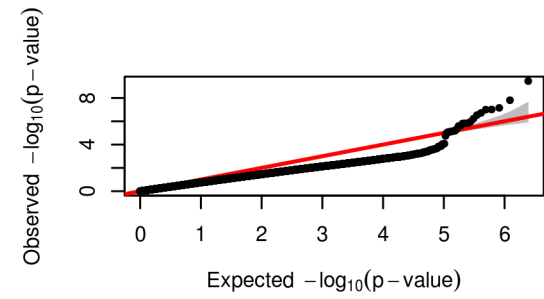

#### d. Days to Tassel

##### Mean Phenotype

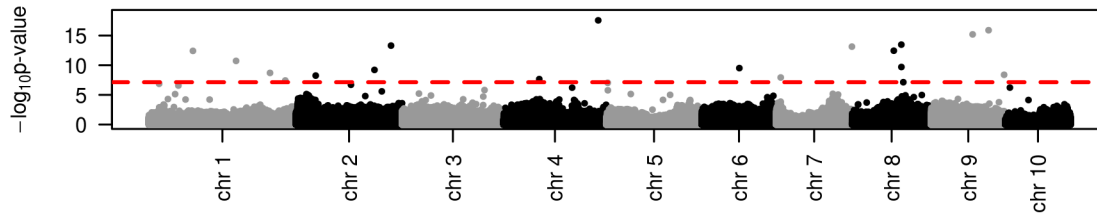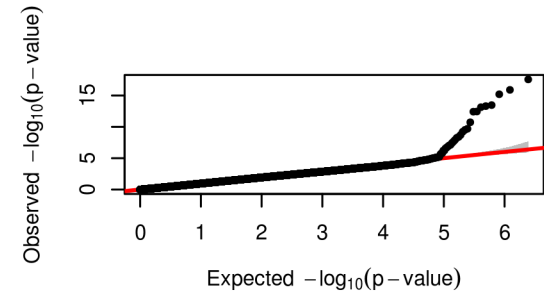

##### Linear Plasticity

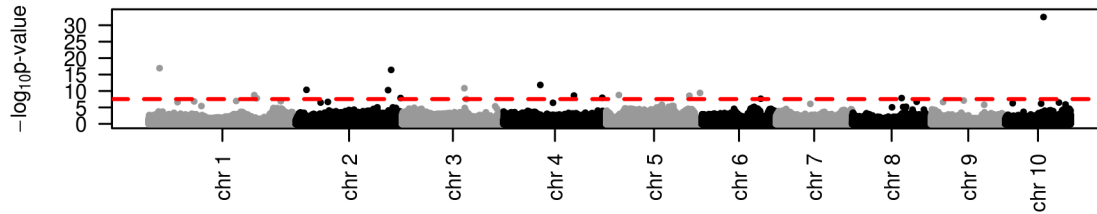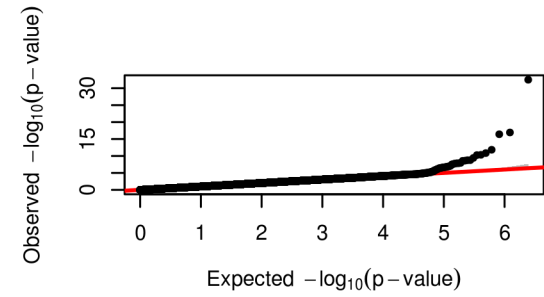

##### Non-linear Plasticity

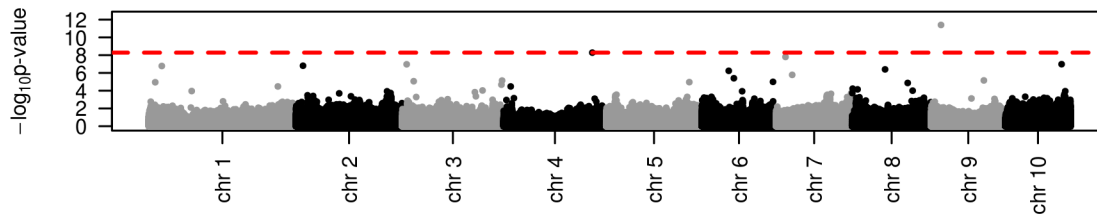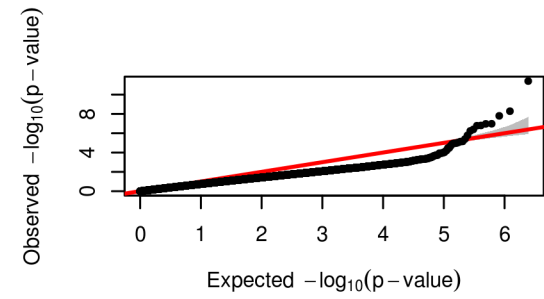



### e. Ear Diameter

#### Mean Phenotype

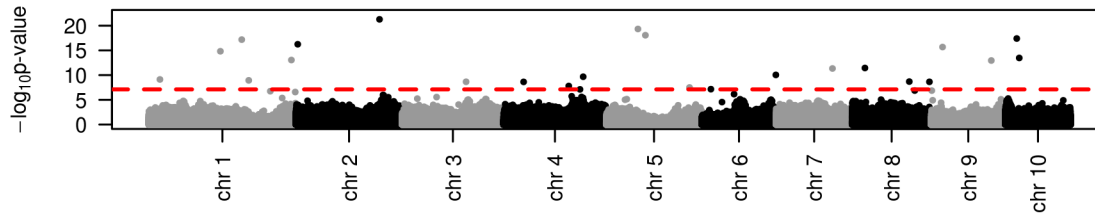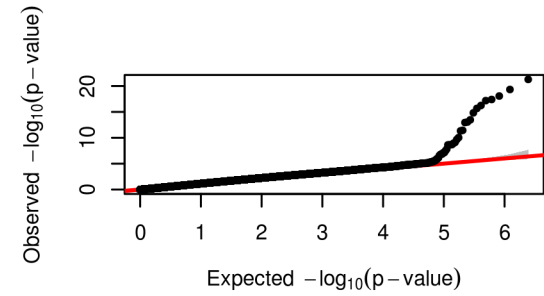

#### Linear Plasticity

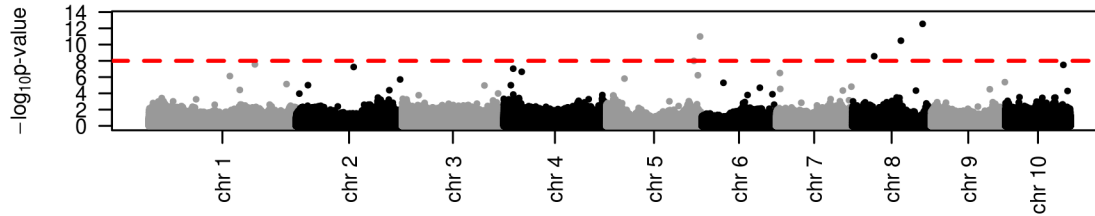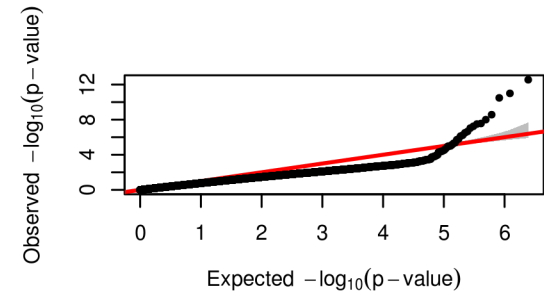

#### Non-linear Plasticity

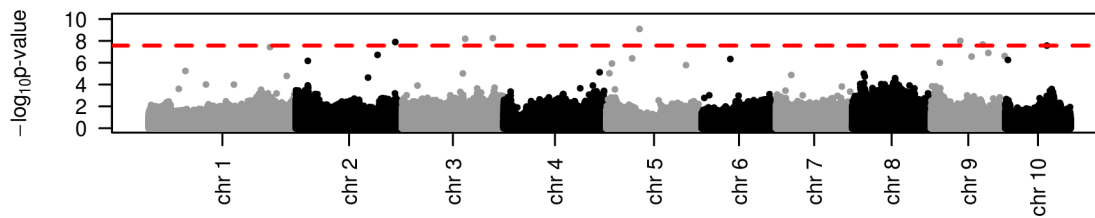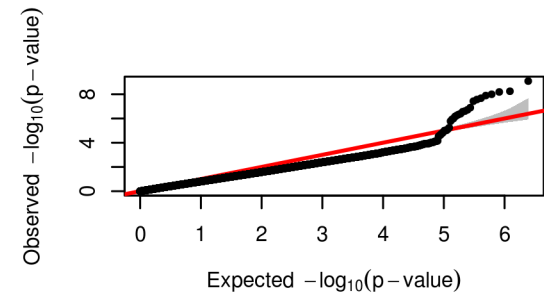

## f. Ear Height

### Mean Phenotype

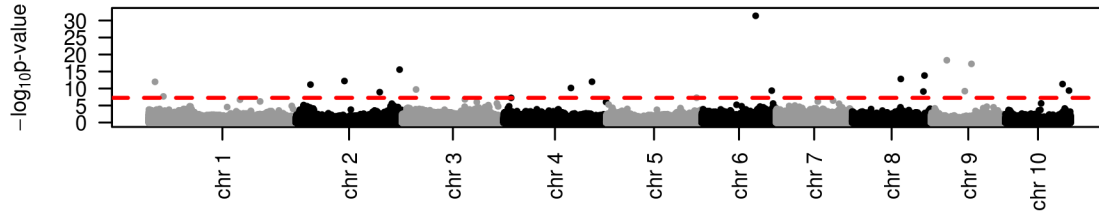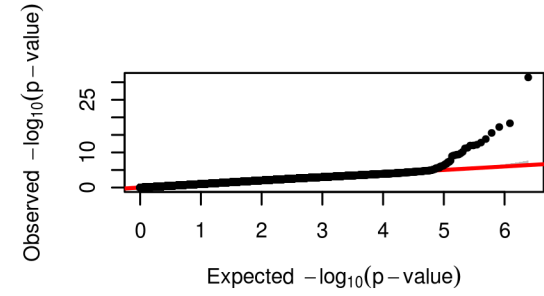

### Linear Plasticity

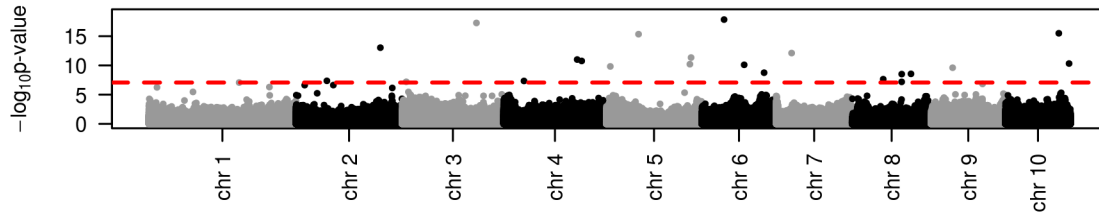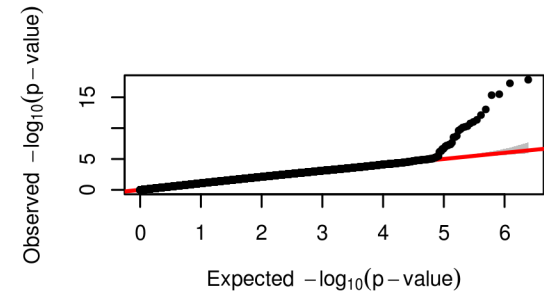

### Non-linear Plasticity

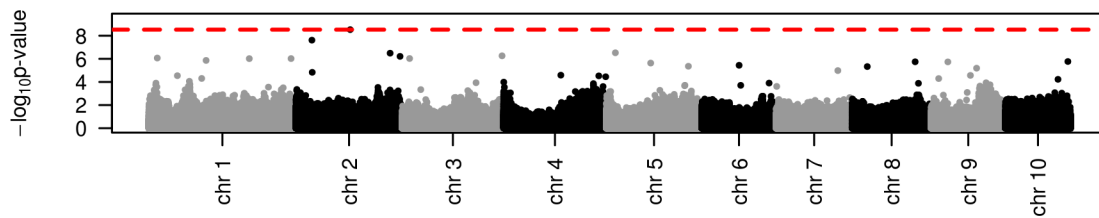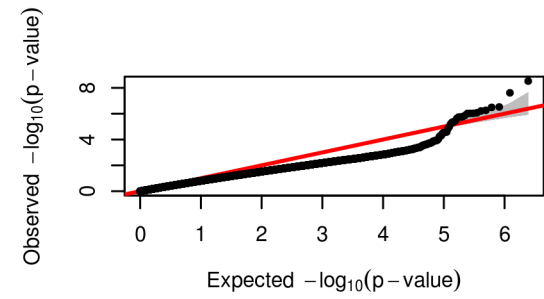

### g. Ear Length

#### Mean Phenotype

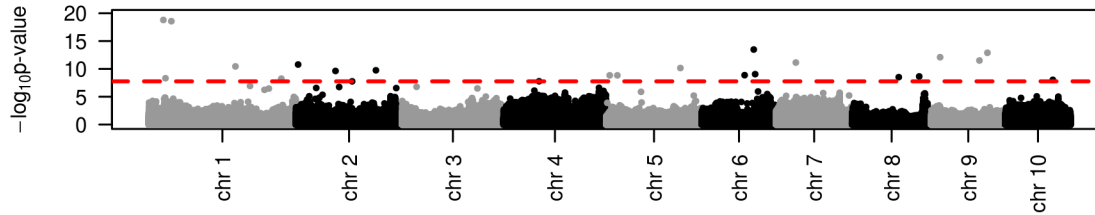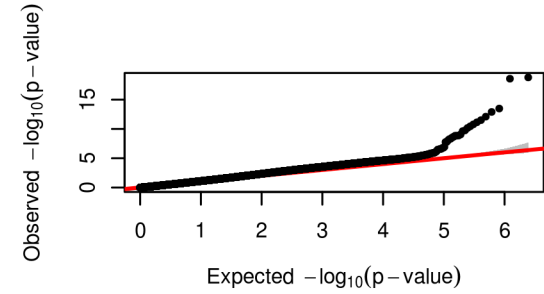

#### Linear Plasticity

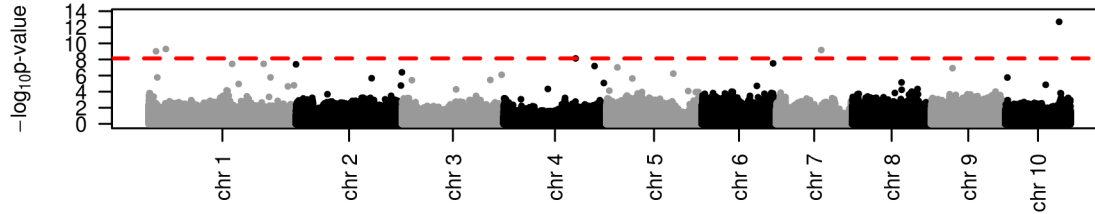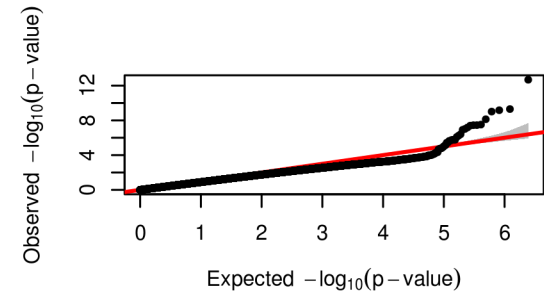

#### Non-linear Plasticity

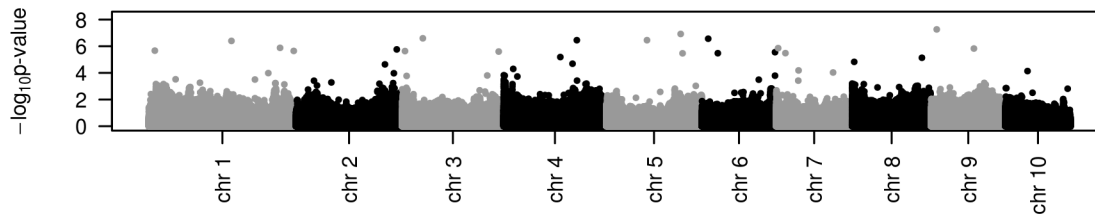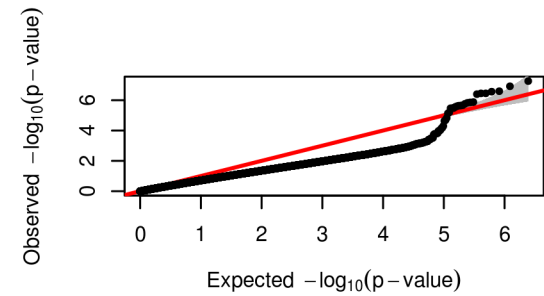

## h. Ear Rank Number

### Mean Phenotype

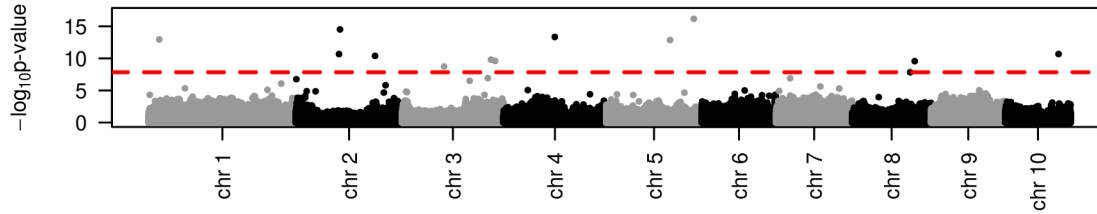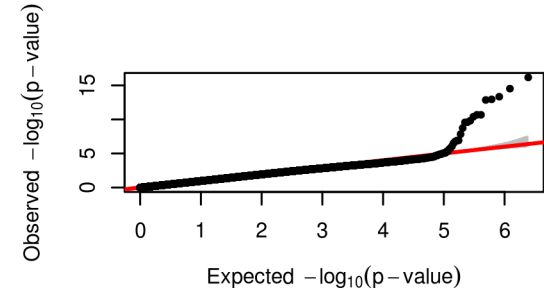

### Linear Plasticity

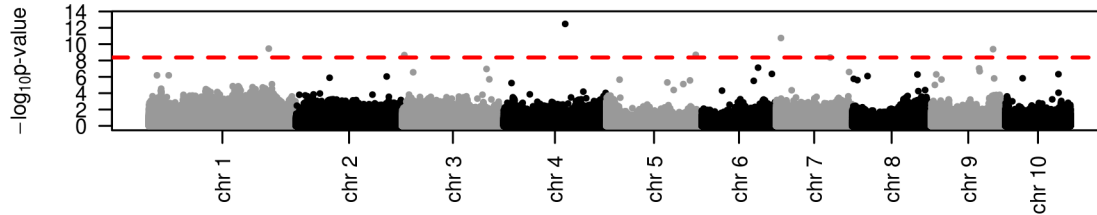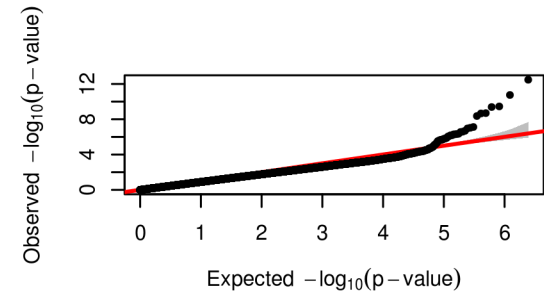

### Non-linear Plasticity

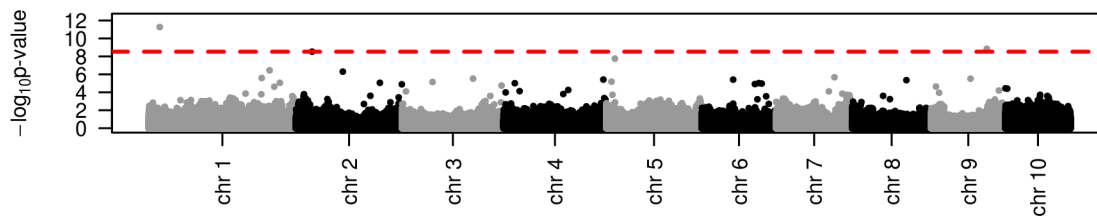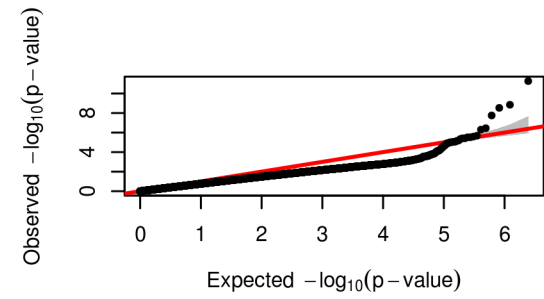

# i. Ear Row Number

## Mean Phenotype

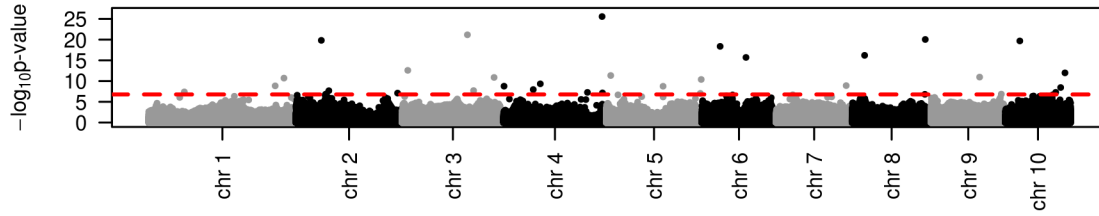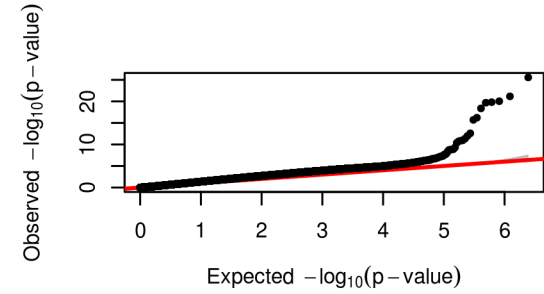

## Linear Plasticity

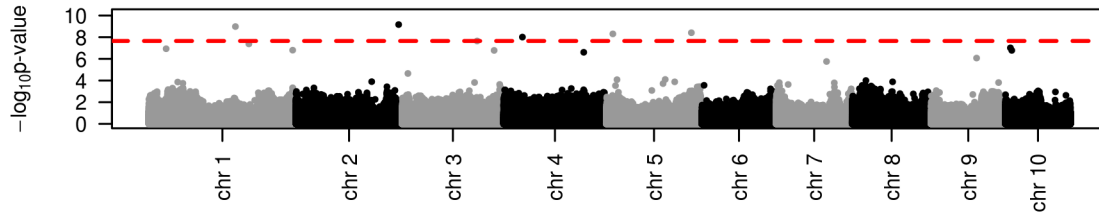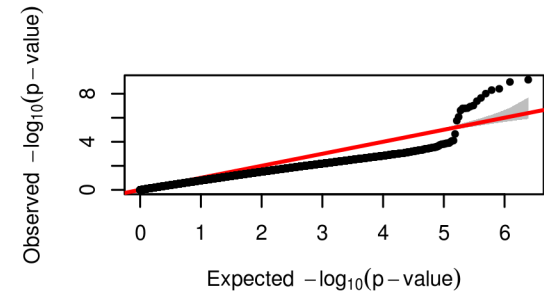

## Non-linear Plasticity

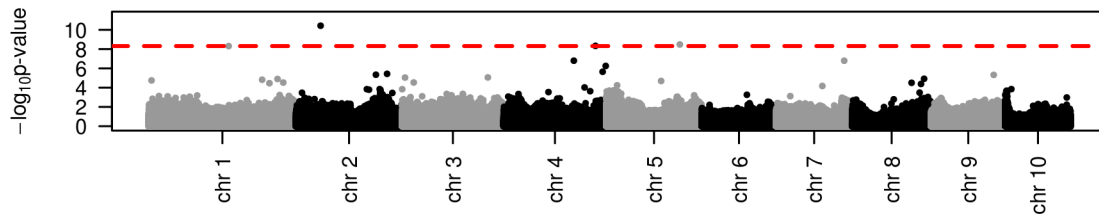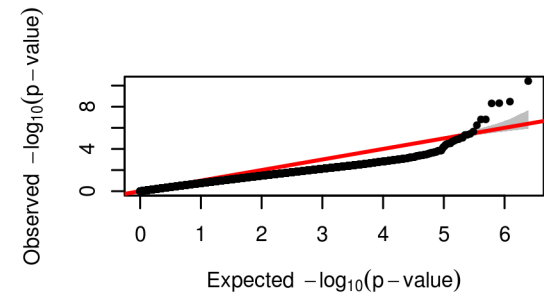

## j. Ear Weight

### Mean Phenotype

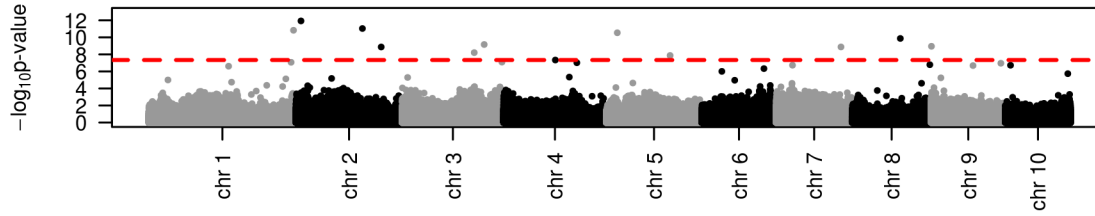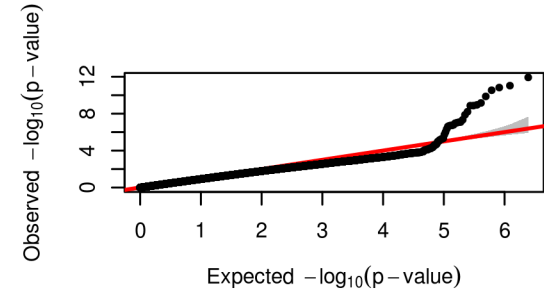

### Linear Plasticity

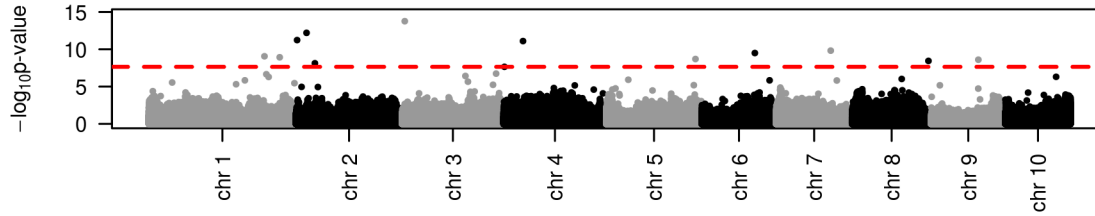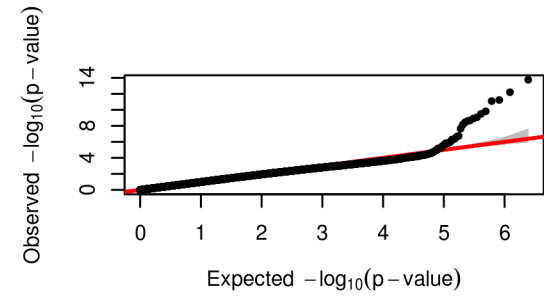

### Non-linear Plasticity

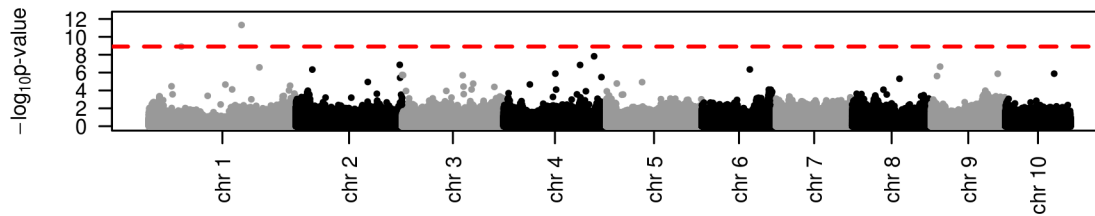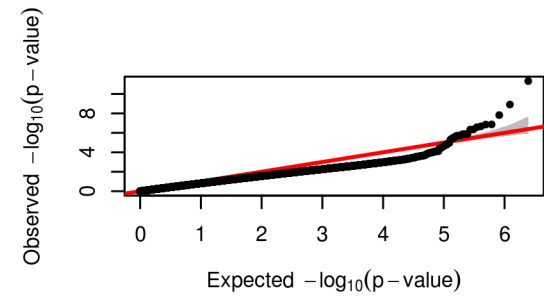

### k. GDD Anthesis Silking Interval

Mean Phenotype

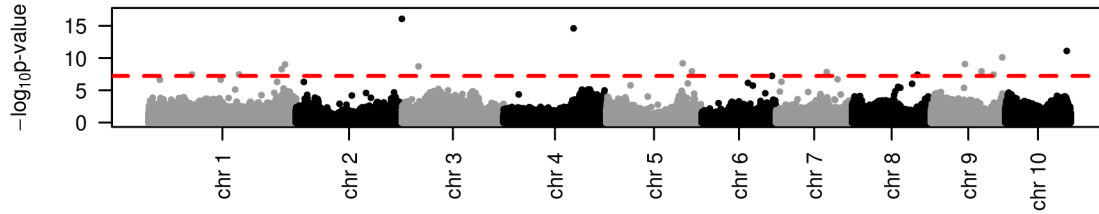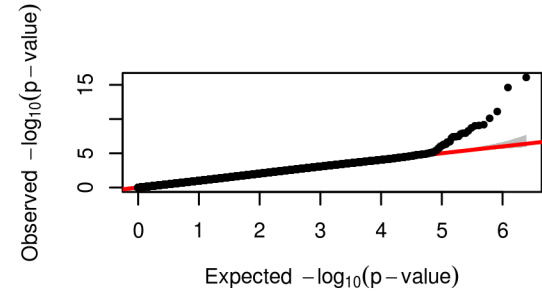

Linear Plasticity

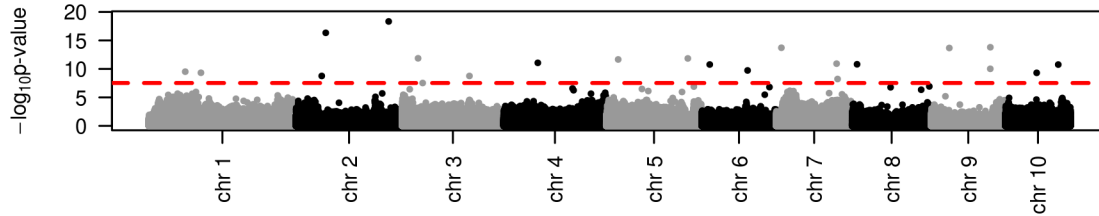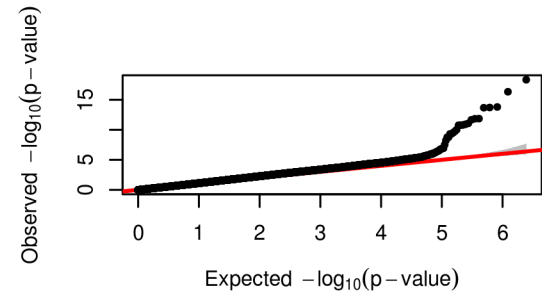

Non-linear Plasticity

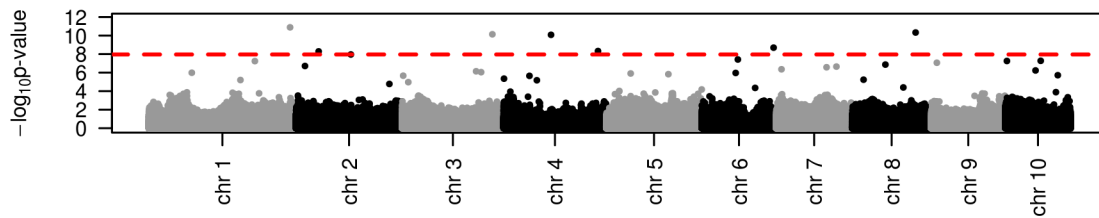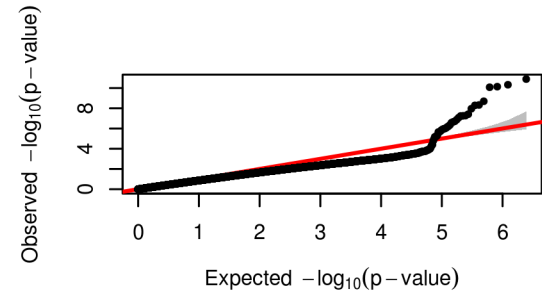

# I. GDD Days to Silk

## Mean Phenotype

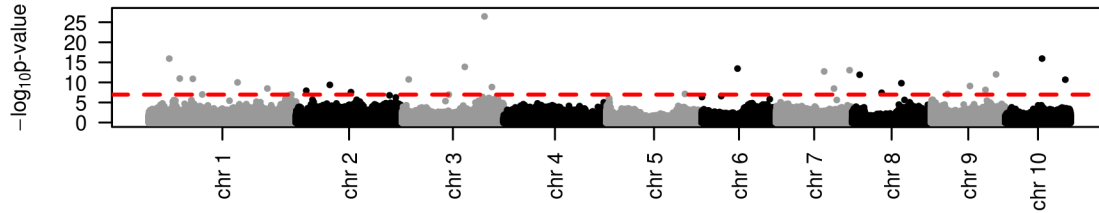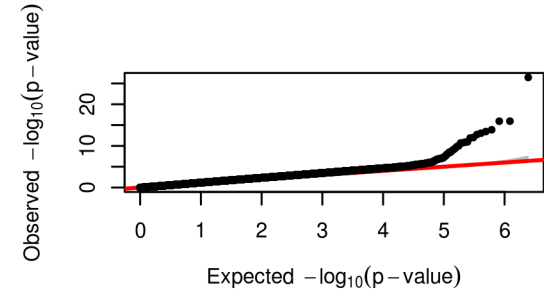

## Linear Plasticity

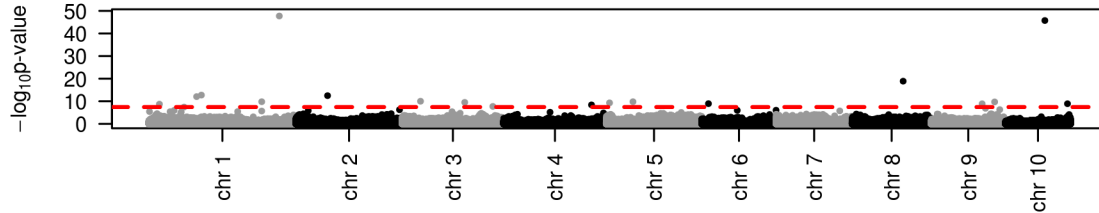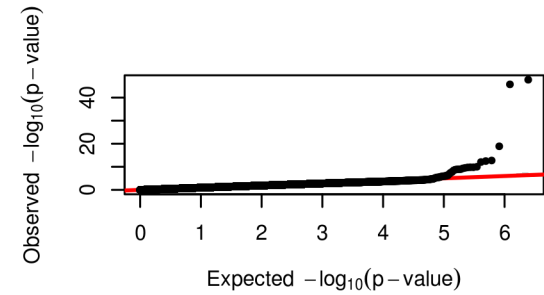

## Non-linear Plasticity

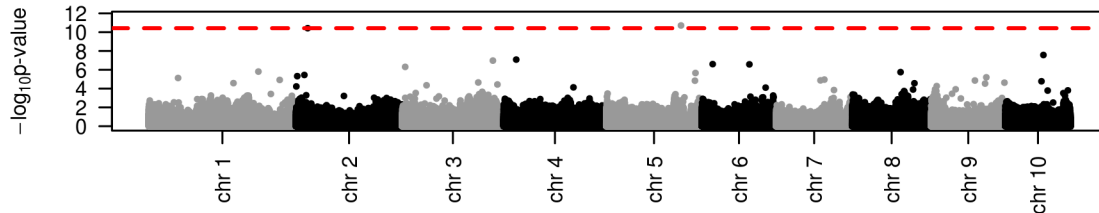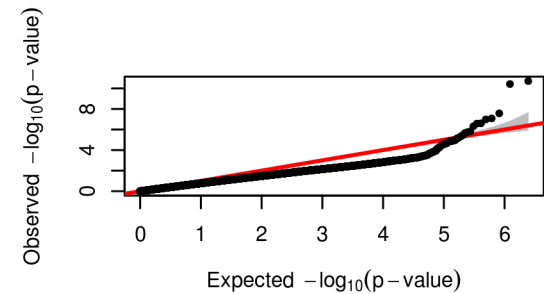



### m. GDD Days to Tassel

#### Mean Phenotype

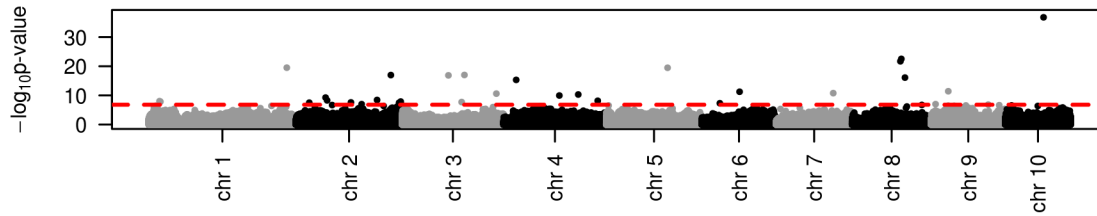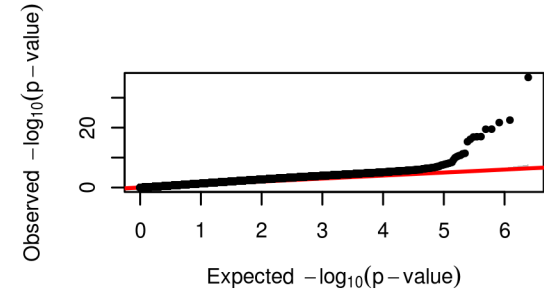

#### Linear Plasticity

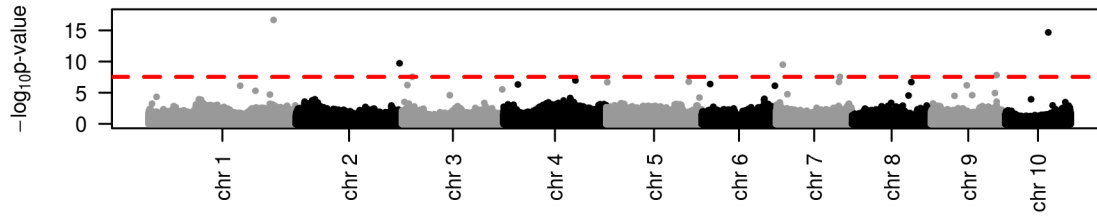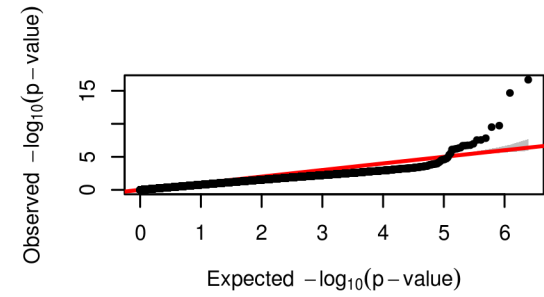

#### Non-linear Plasticity

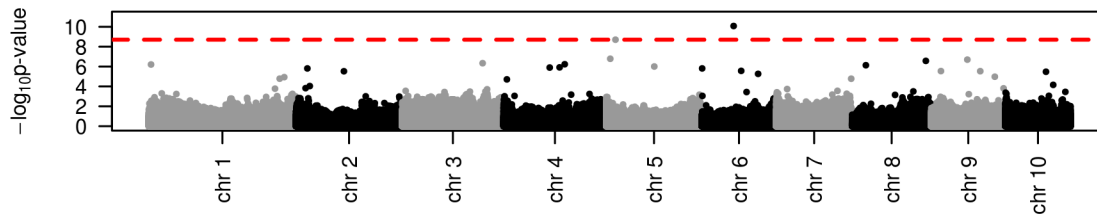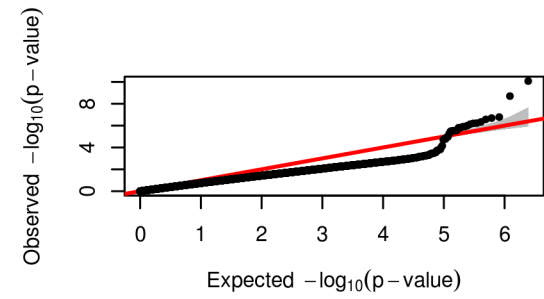

## n. Height above Ear

### Mean Phenotype

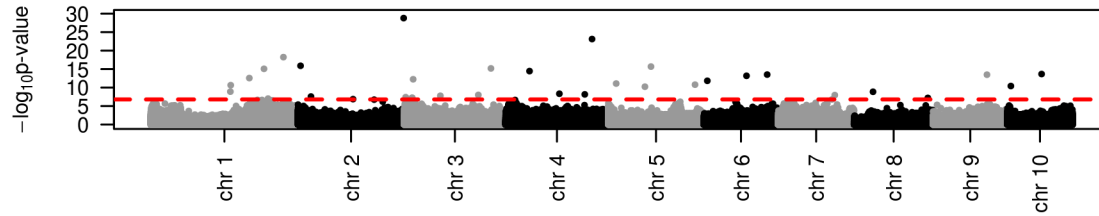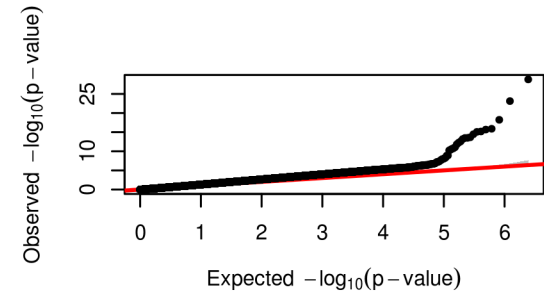

### Linear Plasticity

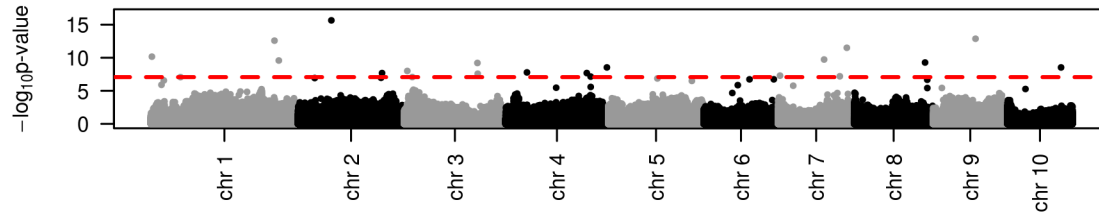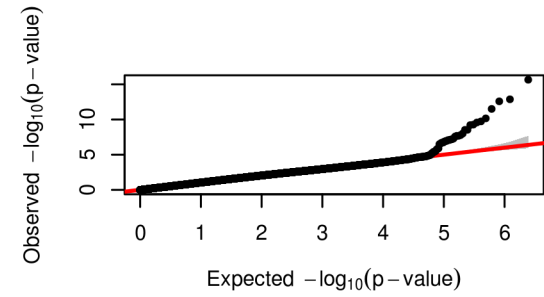

### Non-linear Plasticity

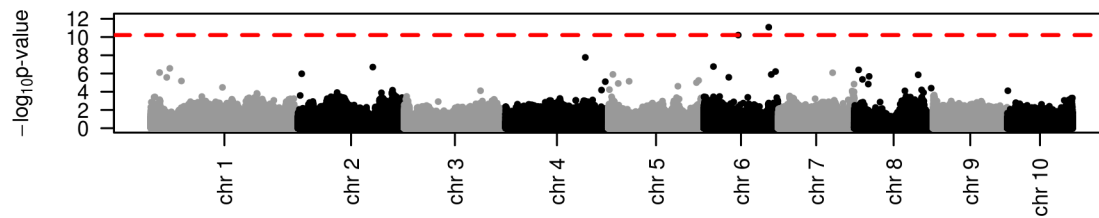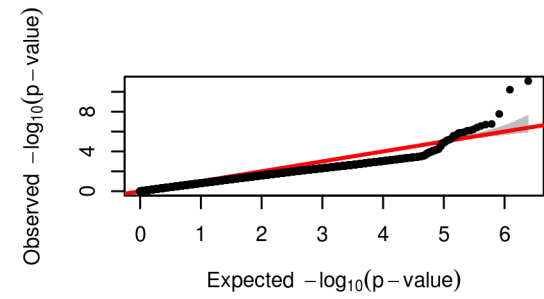

## o. Kernel Depth

### Mean Phenotype

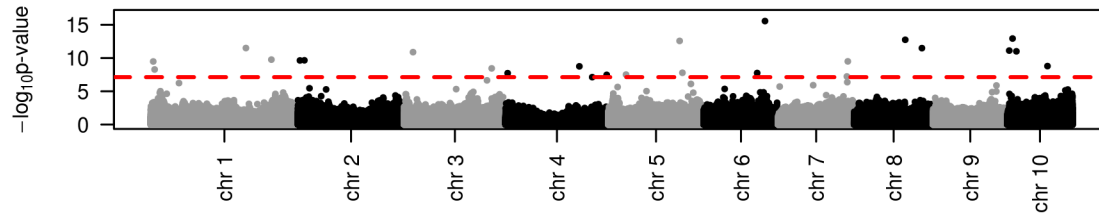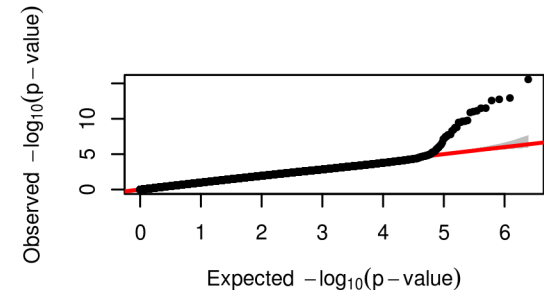

### Linear Plasticity

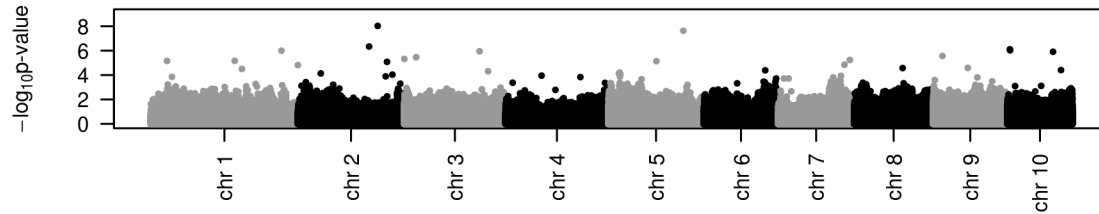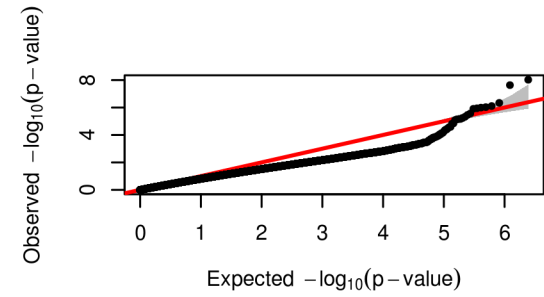

### Non-linear Plasticity

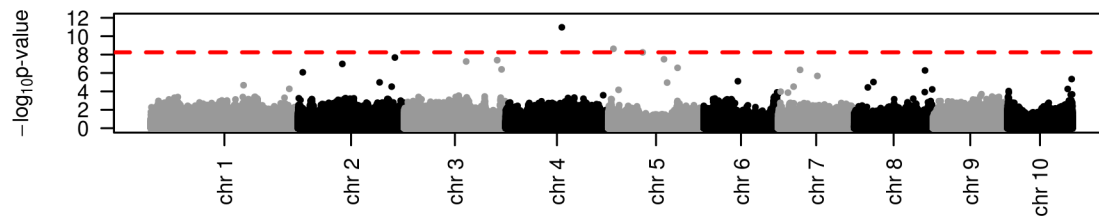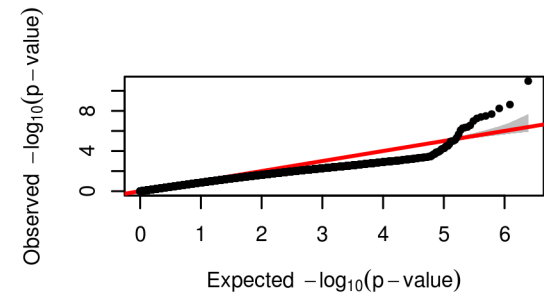

## p. Leaf Length

### Mean Phenotype

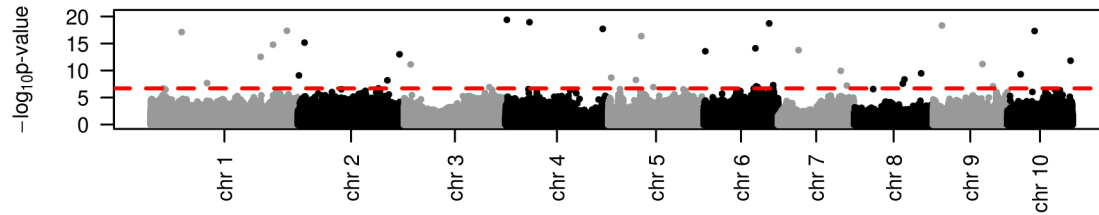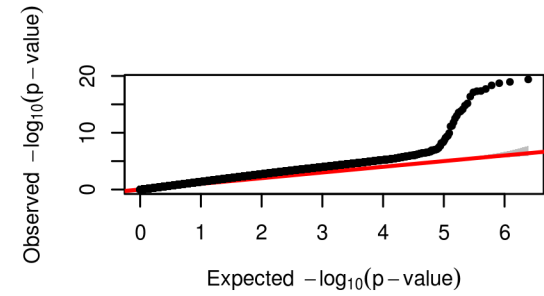

### Linear Plasticity

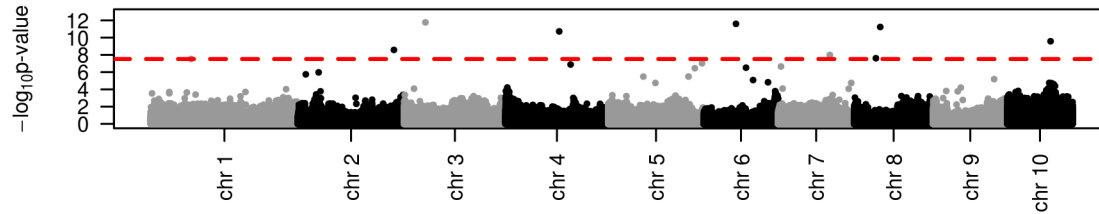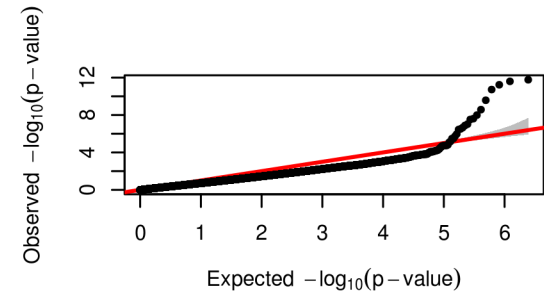

### Non-linear Plasticity

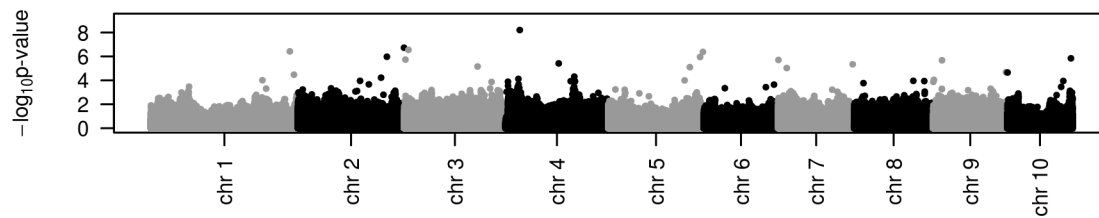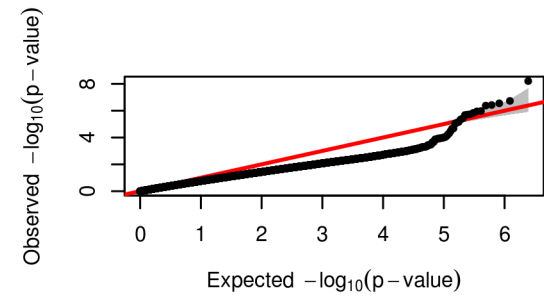

## q. Leaf Width

### Mean Phenotype

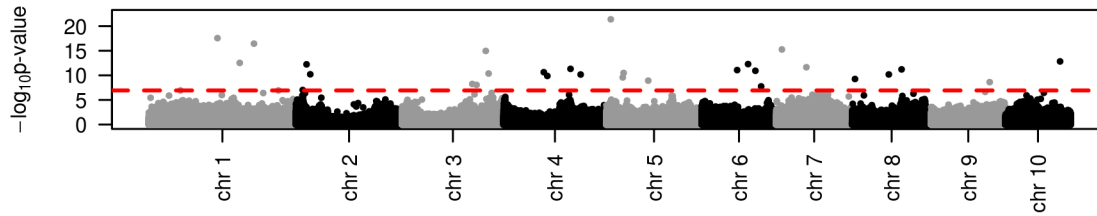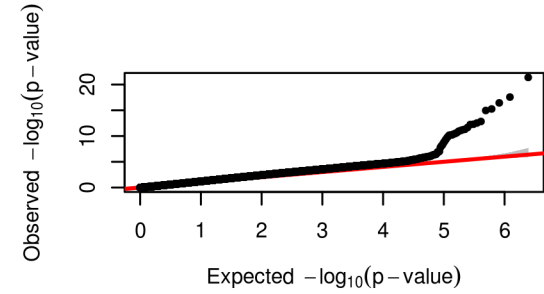

### Linear Plasticity

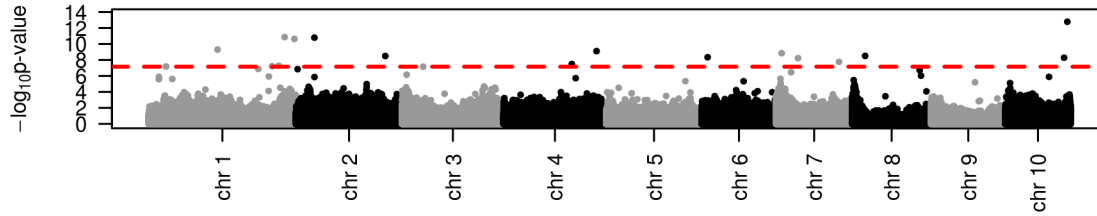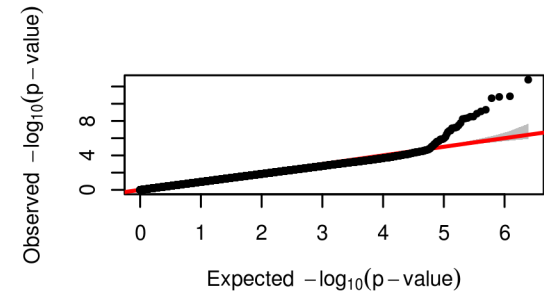

### Non-linear Plasticity

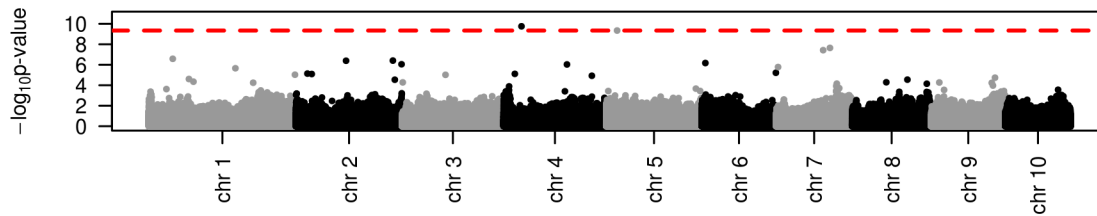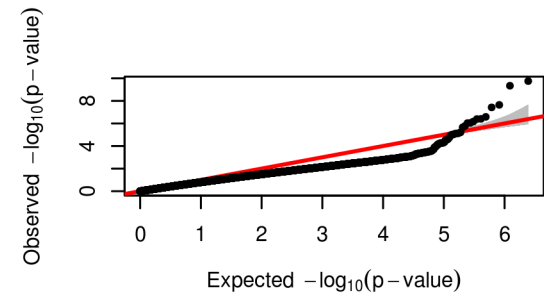

## r. Middle Leaf Angle

### Mean Phenotype

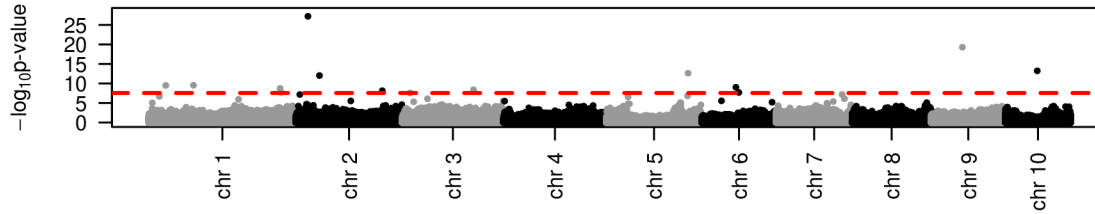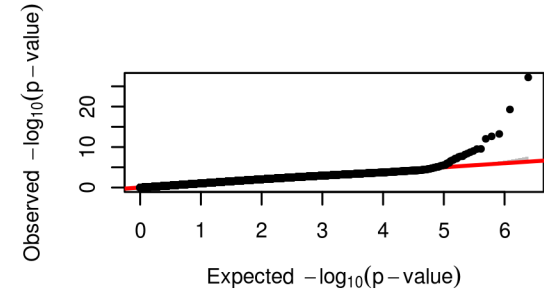

### Linear Plasticity

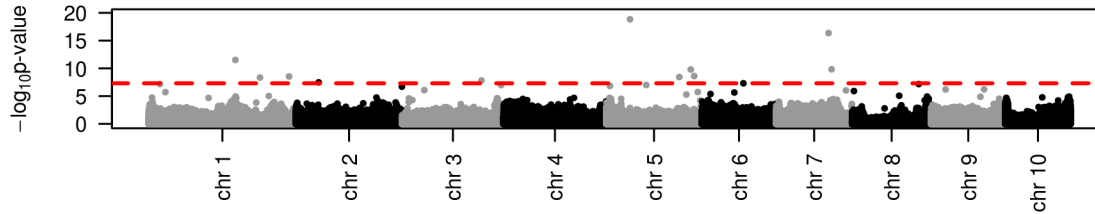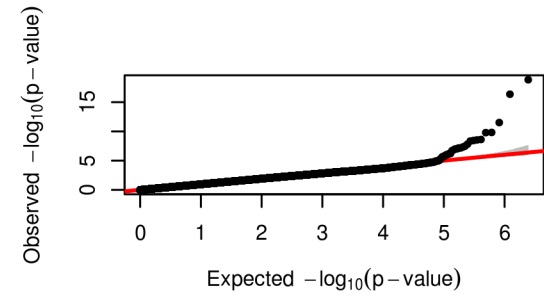

### Non-linear Plasticity

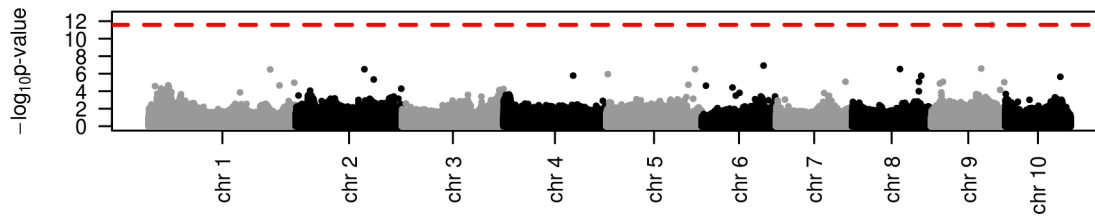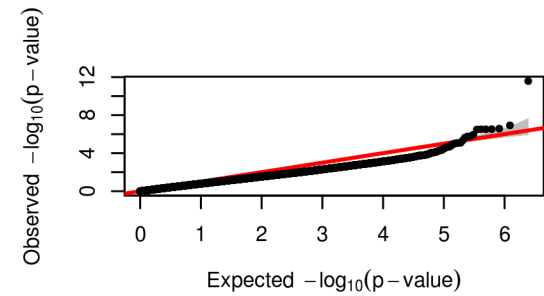

## s. Plant Height

### Mean Phenotype

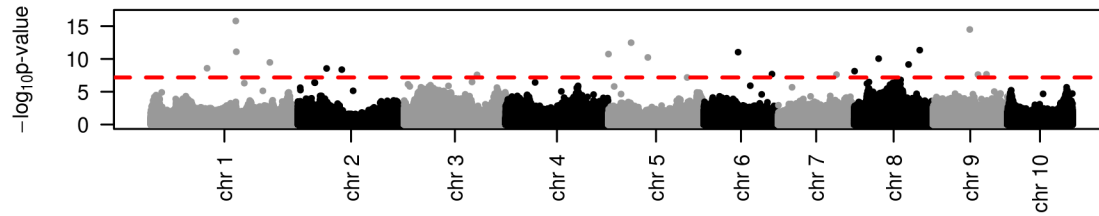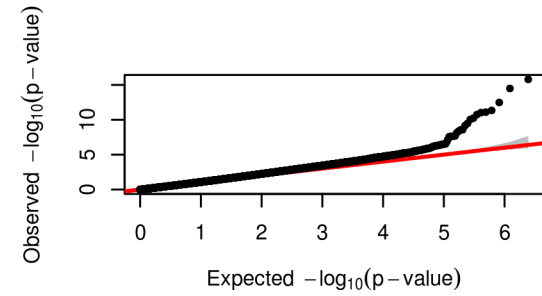

### Linear Plasticity

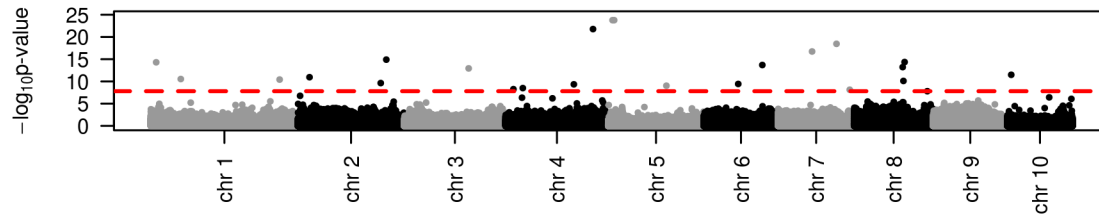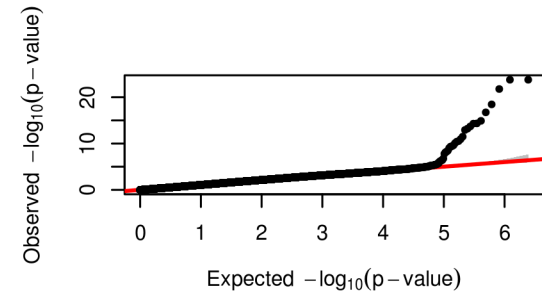

### Non-linear Plasticity

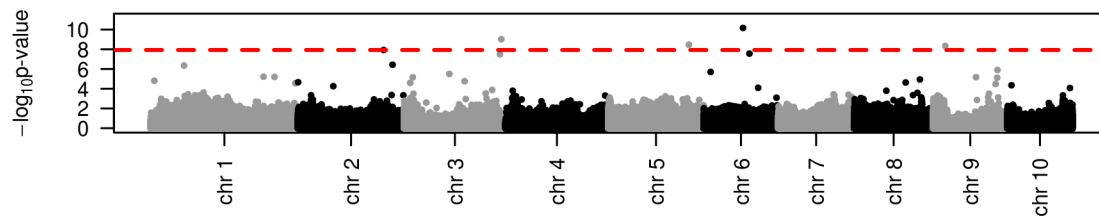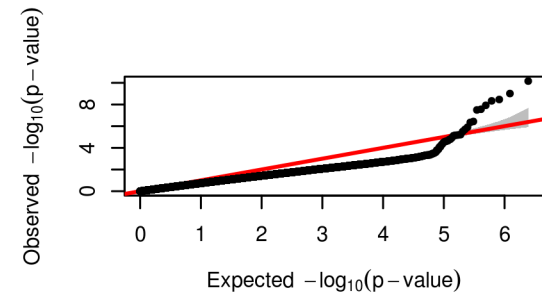

## t. Tassel Length

### Mean Phenotype

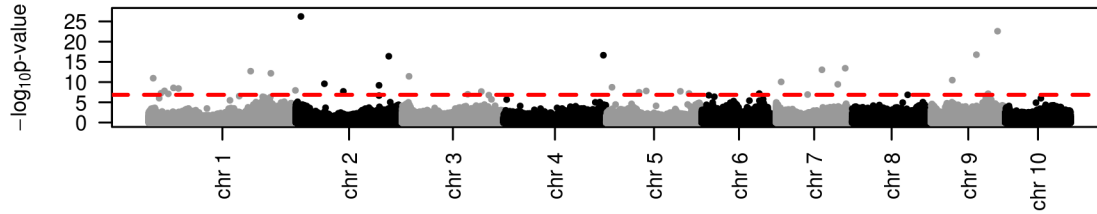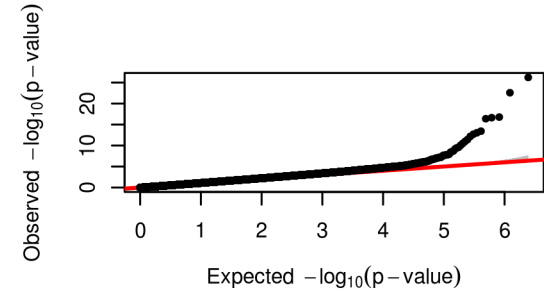

### Linear Plasticity

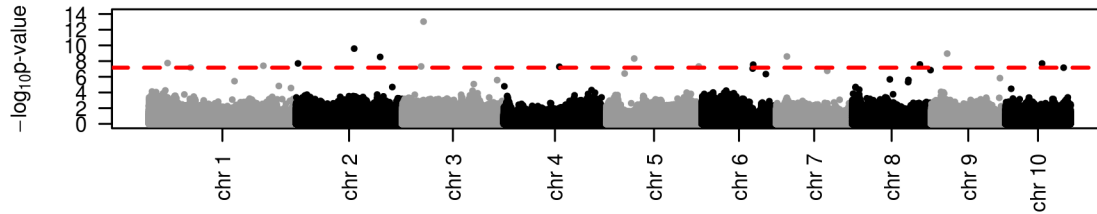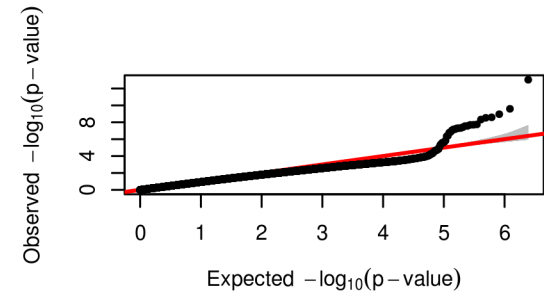

### Non-linear Plasticity

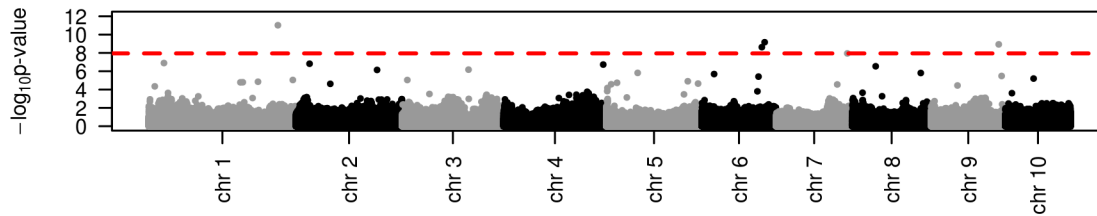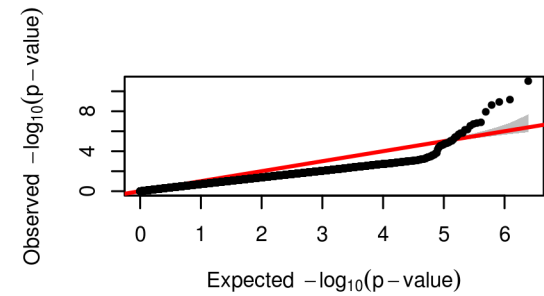



## u. Tassel Primary Branches

### Mean Phenotype

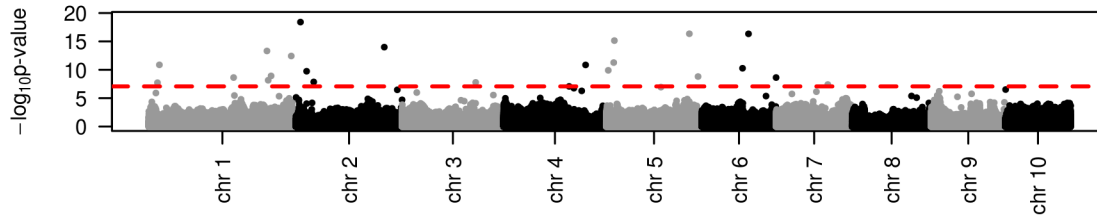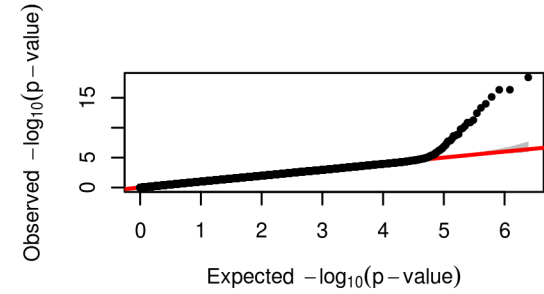

### Linear Plasticity

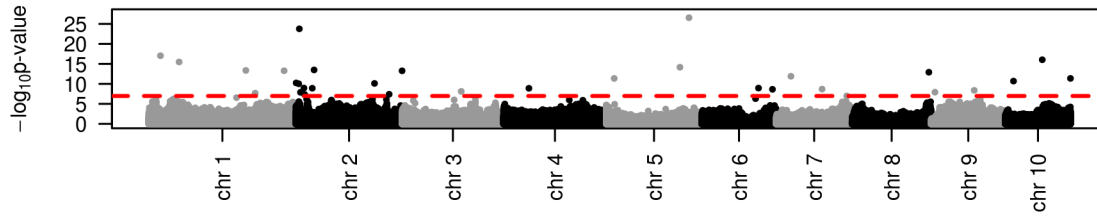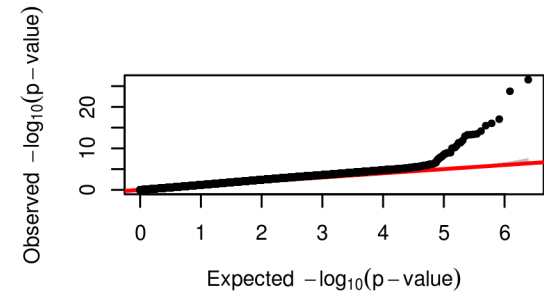

### Non-linear Plasticity

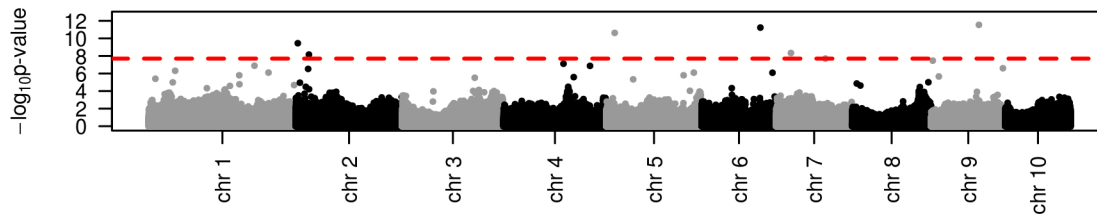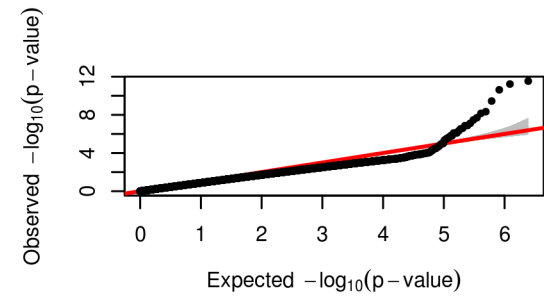

## v. Total Kernel Volume

### Mean Phenotype

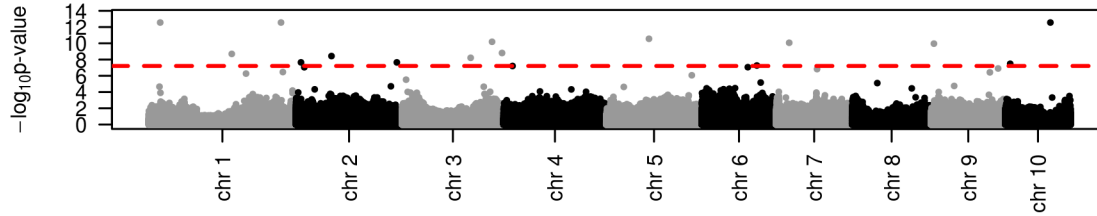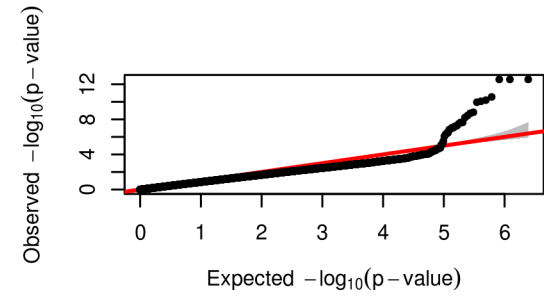

### Linear Plasticity

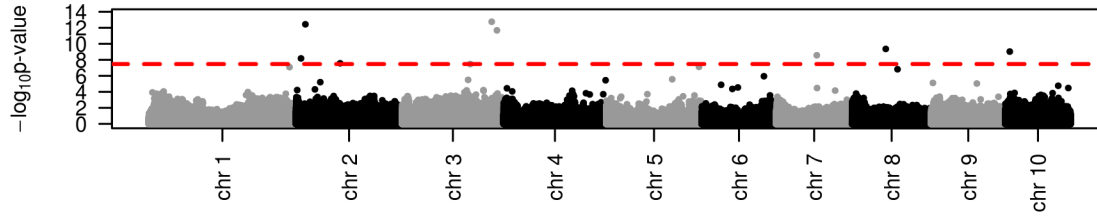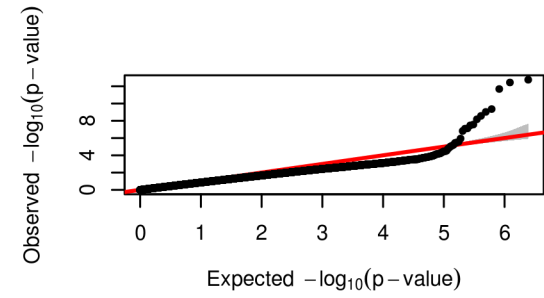

### Non-linear Plasticity

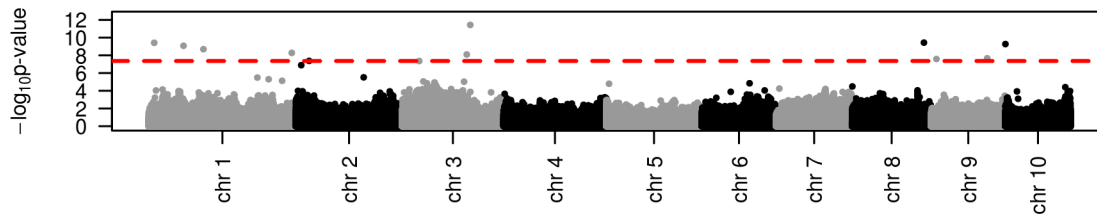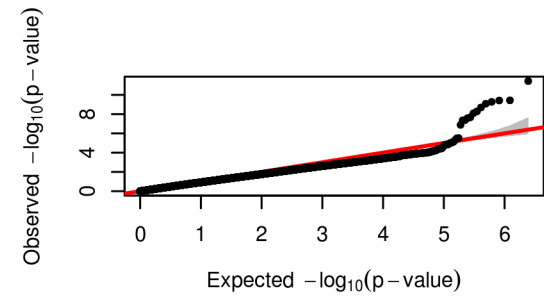

### w. Upper Leaf Angle

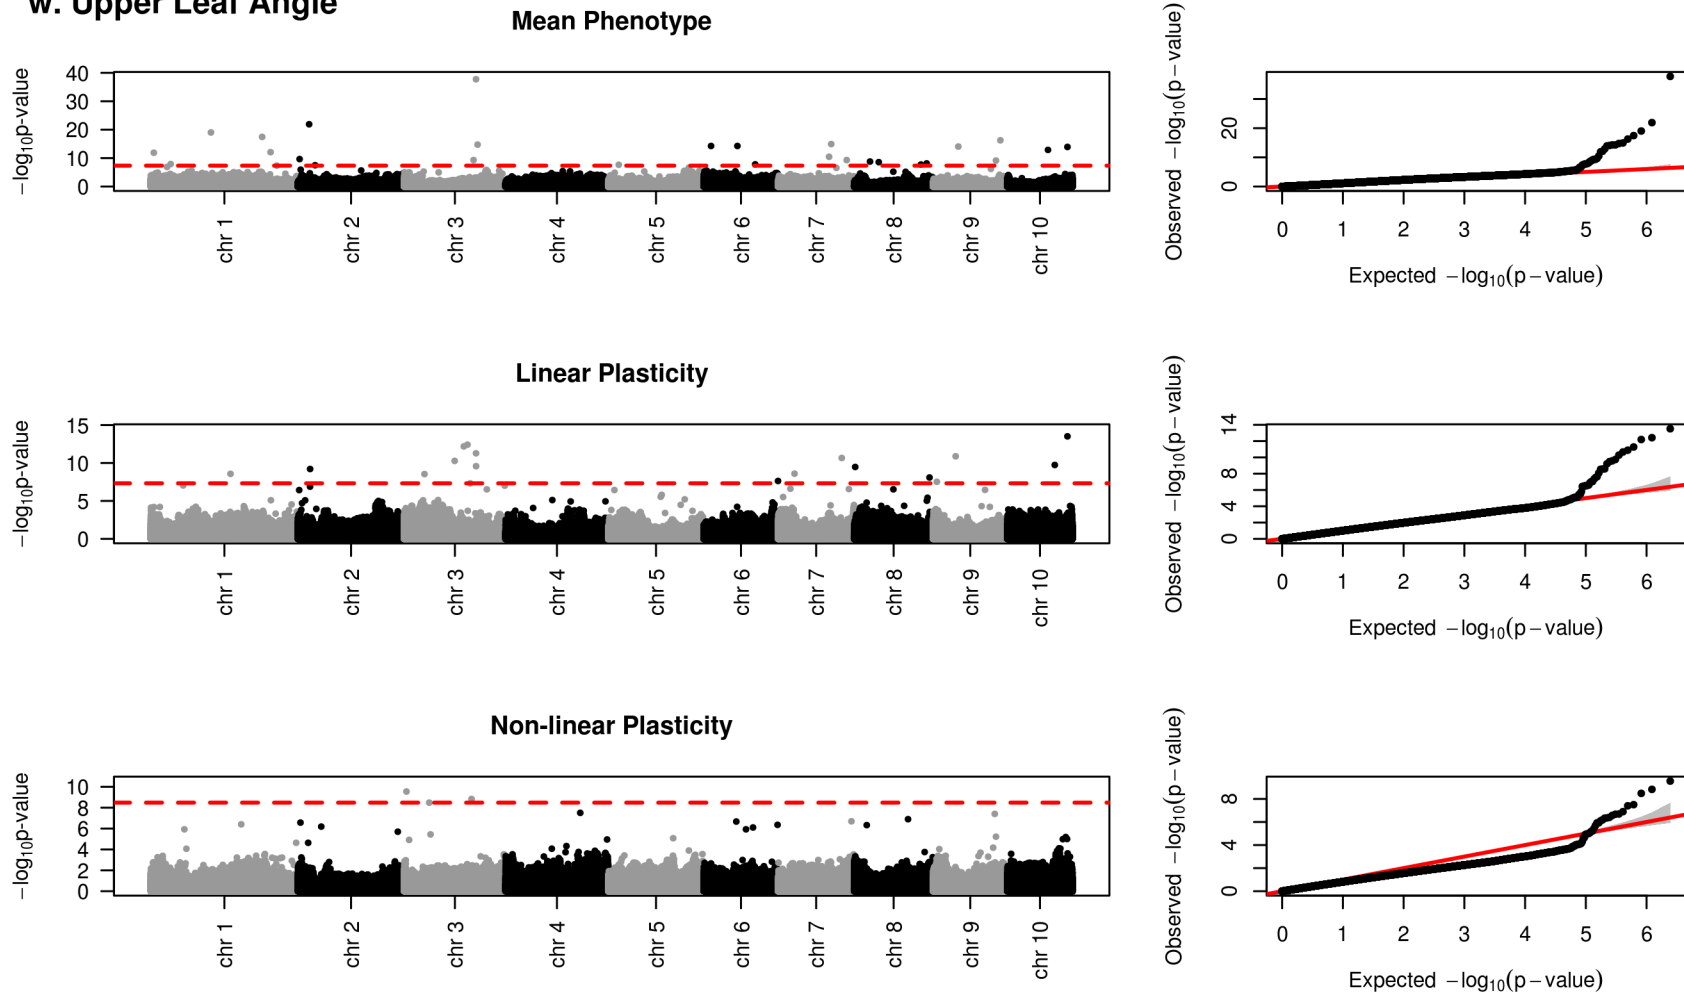

**Supplementary Figure 4.** Manhattan and QQ plots for the mean phenotype value, linear plasticity, and non-linear plasticity of 23 phenotypes. The red dashed line marks the 1% FDR cutoff. **a.** Cob diameter. **b.** Cob weight. **c.** Days to silk. **d.** Days to tassel. **e.** Ear diameter. **f.** Ear height. **g.** Ear length. **h.** Ear rank number. **i.** Ear row number. **j.** Ear weight. **k.** GDD anthesis silking interval. **l.** GDD

to silk. **m.** GDD to tassel. **n.** Height above ear. **o.** Kernel depth. **p.** Leaf length. **q.** Leaf width. **r.** Middle leaf angle. **s.** Plant height. **t.** Tassel length. **u.** Tassel primary branches. **v.** Total kernel volume. **w.** Upper leaf angle.

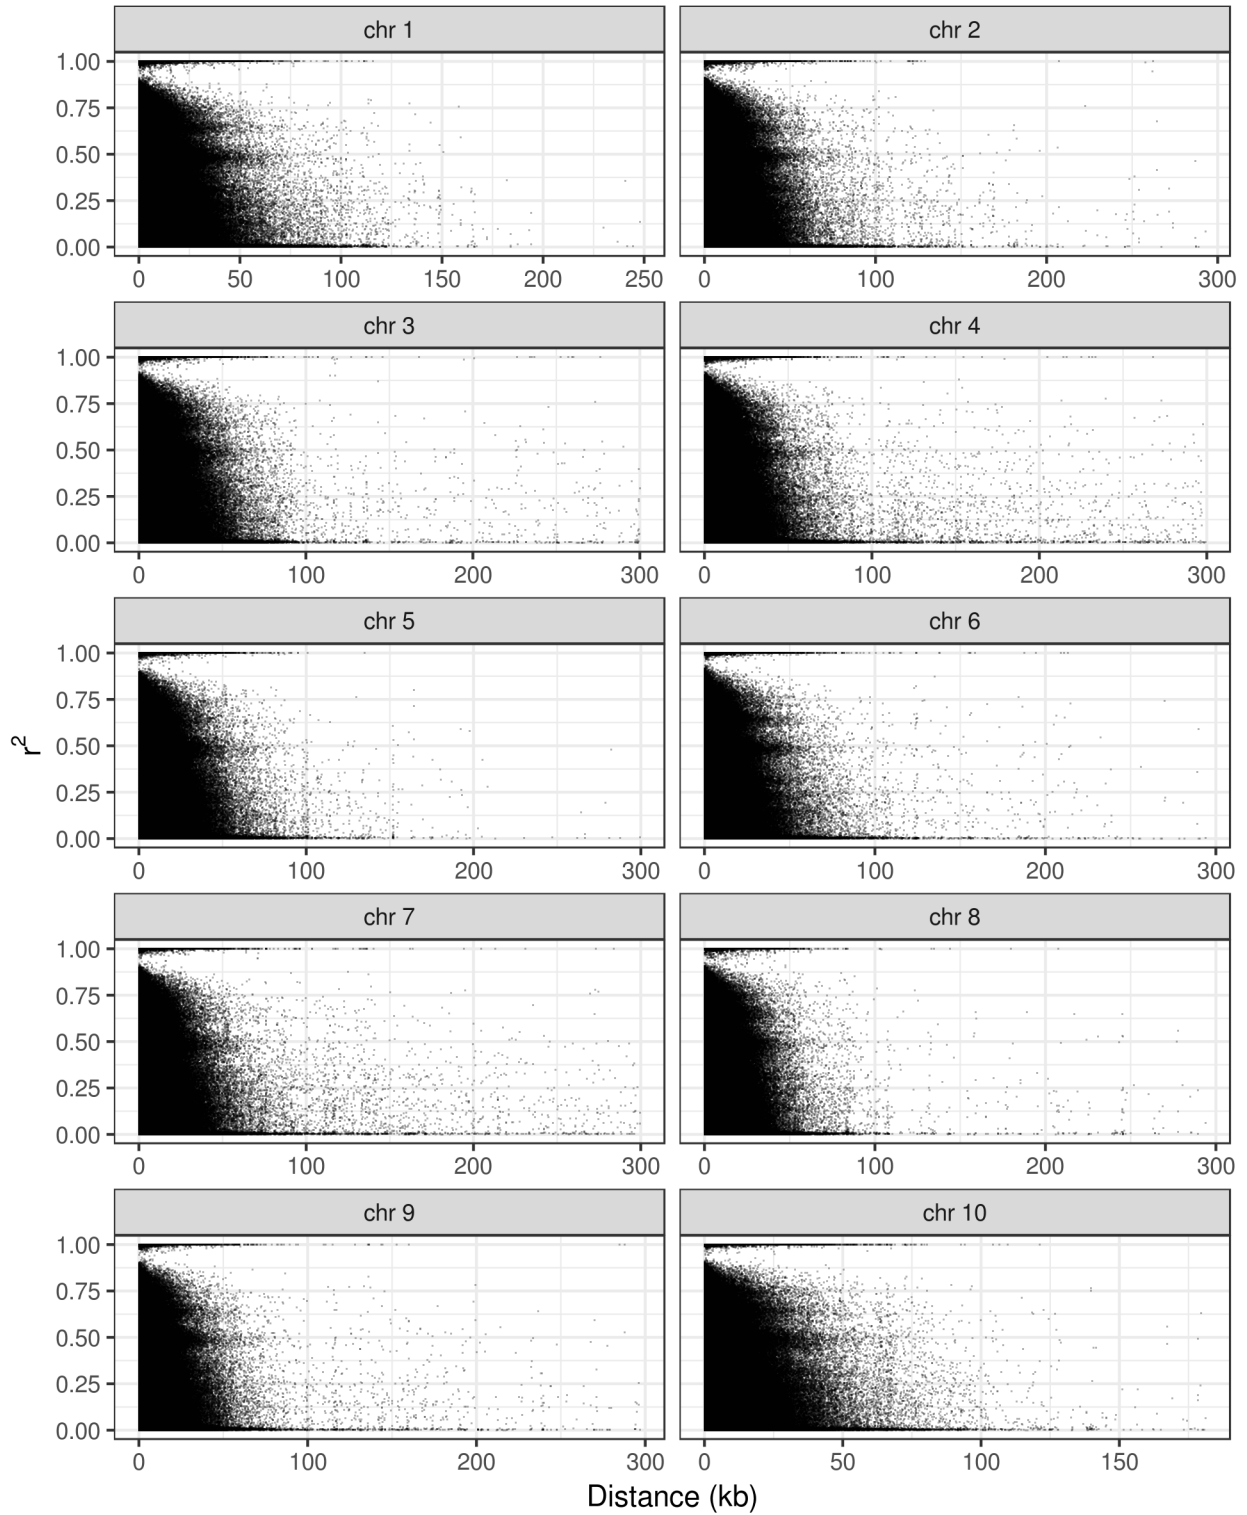

**Supplementary Figure 5.** Pairwise linkage disequilibrium among 2,452,207 SNPs.

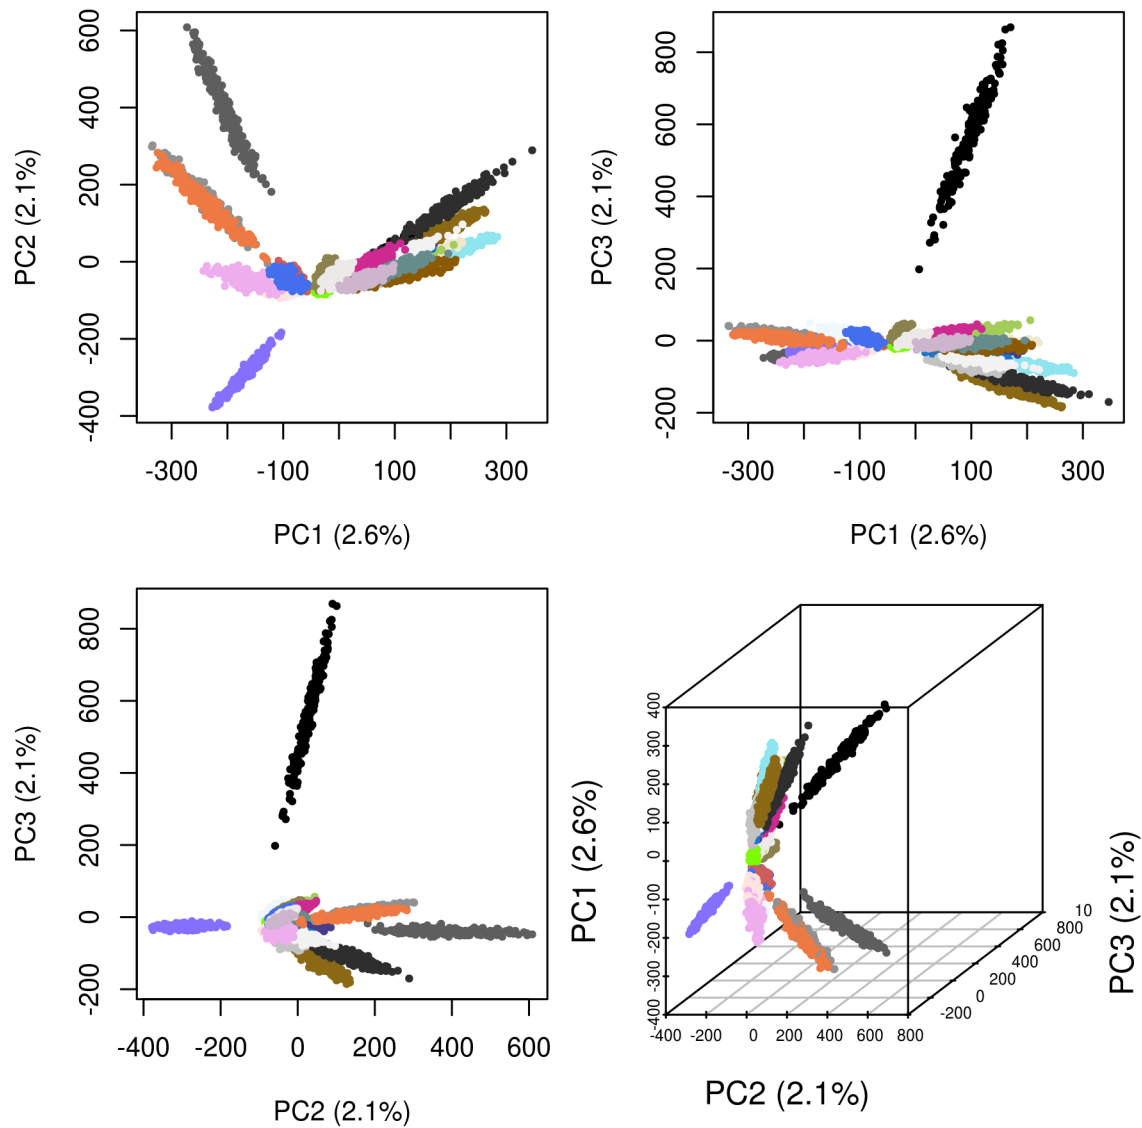

**Supplementary Figure 6.** First three principal components of the genotype matrix. Scatterplots of the first three principal components separate RILs into the 25 NAM subpopulations. The first three principal components explain 6.7% of the variation.

## SUPPLEMENTARY TABLES

**Supplementary Table 1.** Phenotypes included in this study from Panzea.  $N_E$  is the maximum number of environments in which the phenotype was measured.  $N_G$  is the number of RILs for which the phenotype was measured in at least three environments. Papers in the reference column have previously published GWAS results on these mean phenotype values.

| Phenotype                     | $N_E$ | $N_G$ | Total Observations | Reference                                                               |
|-------------------------------|-------|-------|--------------------|-------------------------------------------------------------------------|
| Cob diameter                  | 8     | 4,859 | 29,413             | Brown <i>et al.</i> <sup>2</sup>                                        |
| Cob weight                    | 8     | 4,858 | 29,515             | -                                                                       |
| Days to silk                  | 10    | 4,881 | 41,091             | Buckler <i>et al.</i> <sup>3</sup>                                      |
| Days to tassel                | 10    | 4,884 | 40,677             | Buckler <i>et al.</i> <sup>3</sup> ; Peiffer <i>et al.</i> <sup>4</sup> |
| Ear diameter                  | 8     | 4,826 | 28,750             | -                                                                       |
| Ear height                    | 11    | 4,887 | 43,459             | Peiffer <i>et al.</i> <sup>4</sup>                                      |
| Ear length                    | 8     | 4,859 | 29,707             | Brown <i>et al.</i> <sup>2</sup>                                        |
| Ear rank number               | 7     | 4,672 | 21,914             | -                                                                       |
| Ear row number                | 8     | 4,824 | 28,059             | Brown <i>et al.</i> <sup>2</sup>                                        |
| Ear weight                    | 8     | 4,803 | 28,336             | -                                                                       |
| GDD anthesis-silking interval | 11    | 4,888 | 41,735             | Hung <i>et al.</i> <sup>5</sup>                                         |
| GDD days to silk              | 10    | 4,890 | 38,221             | Hung <i>et al.</i> <sup>5</sup>                                         |
| GDD days to tassel            | 11    | 4,889 | 41,629             | Hung <i>et al.</i> <sup>5</sup>                                         |
| Height above ear              | 11    | 4,887 | 40,907             | Peiffer <i>et al.</i> <sup>4</sup>                                      |
| Kernel depth                  | 8     | 4,819 | 26,655             | -                                                                       |
| Leaf length                   | 9     | 4,888 | 39,002             | Tian <i>et al.</i> <sup>6</sup>                                         |
| Leaf width                    | 9     | 4,890 | 39,039             | Tian <i>et al.</i> <sup>6</sup>                                         |
| Middle leaf angle             | 7     | 4,365 | 16,204             | -                                                                       |
| Plant height                  | 11    | 4,890 | 42,608             | Peiffer <i>et al.</i> <sup>4</sup>                                      |
| Tassel length                 | 8     | 4,880 | 33,149             | Brown <i>et al.</i> <sup>2</sup>                                        |
| Tassel primary branches       | 8     | 4,865 | 33,851             | Brown <i>et al.</i> <sup>2</sup>                                        |
| Total kernel volume           | 5     | 4,307 | 16,789             | -                                                                       |
| Upper leaf angle              | 9     | 4,870 | 35,590             | Tian <i>et al.</i> <sup>6</sup>                                         |

## SUPPLEMENTARY REFERENCES

1. Yan, J. *et al.* Genetic characterization and linkage disequilibrium estimation of a global maize collection using SNP markers. *PLoS One* **4**, e8451 (2009).
2. Brown, P. J. *et al.* Distinct genetic architectures for male and female inflorescence traits of maize. *PLoS Genet.* **7**, e1002383 (2011).
3. Buckler, E. S. *et al.* The genetic architecture of maize flowering time. *Science (80-. ).* **325**, 714–718 (2009).
4. Peiffer, J. A. *et al.* The genetic architecture of maize height. *Genetics* **196**, 1337–56 (2014).
5. Hung, H.-Y. *et al.* The relationship between parental genetic or phenotypic divergence and progeny variation in the maize nested association mapping population. *Heredity (Edinb).* **108**, 490–9 (2012).
6. Tian, F. *et al.* Genome-wide association study of leaf architecture in the maize nested association mapping population. *Nat. Genet.* **43**, 159–162 (2011).
